# Precursor processes of human self-initiated action

Short title: Precursor processes of self-initiated action

Nima Khalighinejad<sup>a1</sup>, Aaron Schurger<sup>b</sup>, Andrea Desantis<sup>a2</sup>, Leor Zmigrod<sup>c</sup>,

Patrick Haggard<sup>a\*</sup>

<sup>a</sup> Institute of Cognitive Neuroscience, University College London, London WC1N 3AR, UK

<sup>b</sup> Cognitive Neuroimaging Unit, CEA DRF/I2BM, INSERM, Université Paris-Sud, Université Paris-Saclay, NeuroSpin center, 91191 Gif/Yvette, France

<sup>c</sup> Department of Psychology, University of Cambridge, Cambridge CB2 3EB, UK

\* Correspondence should be addressed to Patrick Haggard, Institute of Cognitive Neuroscience, University College London, Alexandra House, 17 Queen Square, London WC1N 3AR, UK. Tel: +44 (0)20 7679 1149, E-mail: [p.haggard@ucl.ac.uk](mailto:p.haggard@ucl.ac.uk)

<sup>1</sup> NK is currently at Wellcome Centre for Integrative Neuroimaging, Department of Experimental Psychology, University of Oxford, Oxford, UK

<sup>2</sup> AD is currently at Laboratoire Psychologie de la Perception, Université Paris Descartes & CNRS (UMR 8242), Paris, France

## Abstract

A gradual buildup of electrical potential over motor areas precedes self-initiated movements. Recently, such “readiness potentials” (RPs) were attributed to stochastic fluctuations in neural activity. We developed a new experimental paradigm that operationalised self-initiated actions as endogenous ‘skip’ responses while waiting for target stimuli in a perceptual decision task. We compared these to a block of trials where participants could not choose when to skip, but were instead instructed to skip. Frequency and timing of motor action were therefore balanced across blocks, so that conditions differed only in how the timing of skip decisions was generated. We reasoned that across-trial variability of EEG could carry as much information about the source of skip decisions as the mean RP. EEG variability decreased more markedly prior to self-initiated compared to externally-triggered skip actions. This convergence suggests a consistent preparatory process prior to self-initiated action. A leaky stochastic accumulator model could reproduce this convergence given the additional assumption of a systematic decrease in input noise prior to self-initiated actions. Our results may provide a novel neurophysiological perspective on the topical debate regarding whether self-initiated actions arise from a deterministic neurocognitive process, or from neural stochasticity. We suggest that the key precursor of self-initiated action may manifest as a reduction in neural noise.

**Keywords:** self-initiated action; externally-triggered action; readiness potential; stochastic fluctuations; human

## 1 **1. Introduction**

2 Functional and neuroanatomical evidence has been used to distinguish between two broad  
3 classes of human actions: self-initiated actions that happen endogenously, in the absence of  
4 any specific stimulus (Haggard, 2008; Passingham et al., 2010), and reactions to external  
5 cues. Endogenous actions are distinctive in several ways. First, they depend on an internal  
6 decision to act and are not triggered by external stimuli. In other words, the agent decides  
7 internally what to do, or when to do it, without any external cue specifying the action  
8 (Passingham et al., 2010). Second, we often deliberate and consider reasons before  
9 choosing and performing one course of action rather than an alternative. Thus, endogenous  
10 actions should be responsive to reasons (Anscombe, 2000).

11 Many neuroscientific studies of self-initiated action lack this reasons-responsive quality.  
12 They often involve the paradoxical instruction to ‘act *freely*’ e.g., “press a key when you feel  
13 the urge to do so” (Cunnington et al., 2002; Jahanshahi et al., 1995; Libet et al., 1983; Wiese  
14 et al., 2004). However, this instruction has been justifiably criticised (Nachev and Hacker,  
15 2014). Here, we adapted for humans a paradigm previously used in animal research  
16 (Murakami et al., 2014), which embeds endogenous actions within the broader framework of  
17 decision-making. Participants responded to the direction of unpredictably-occurring dot  
18 motion stimuli by pressing left or right arrow keys (Gold and Shadlen, 2007). Importantly,  
19 they could also choose to skip waiting for the stimuli to appear, by pressing both keys  
20 simultaneously whenever they wished. The skip response thus reflects a purely endogenous  
21 decision to act, without any direct external stimulus, and provides an operational definition of  
22 a self-initiated action. Self-initiated ‘skip’ responses were compared to a block where  
23 participants made the same bilateral ‘skip’ actions in response to an unpredictable change in  
24 the fixation point (Figure. 1).

25 Controversies regarding precursor processes have been central to neuroscientific debates  
26 about volition (Dennett, 2015; Libet et al., 1983). The classical neural precursor is the

27 readiness potential (RP: (Kornhuber and Deecke, 1965). The RP is taken to be “the electro-  
28 physiological sign of planning, preparation, and initiation of volitional acts” (Kornhuber and  
29 Deecke, 1990) and was considered a pre-requisite of the conscious intention to act (Libet et  
30 al., 1983; Sinnott-Armstrong and Nadel, 2010).

31 Classical studies explicitly or implicitly assume that the RP reflects a putative ‘internal  
32 volitional signal’, with a constant, characteristic ramp-like form, necessarily preceding action  
33 initiation - although this signal is heavily masked by noise on any individual trial (Dirnberger  
34 et al., 2008). However, the idea that the RP reflects a specific precursor process has been  
35 recently challenged. Instead, the time of crossing a threshold for movement could depend in  
36 part on stochastic fluctuations in neural activity (Murakami et al., 2014; Schurger et al.,  
37 2012). Crucially, averaging such fluctuations time-locked to action initiation reproduced the  
38 “build-up” pattern of the mean RP, suggesting that the classical interpretation of RP as a  
39 stable precursor of voluntary action could be deceptive. On this account, RP is not a specific,  
40 goal-directed process that triggers action, but is rather an artefact of biased sampling and  
41 averaging of neural noise (Murakami et al., 2014; Schurger et al., 2012).

42 However, classical and stochastic models offer different explanations for the variability of  
43 EEG signals prior to self-initiated action. On the stochastic model, neural activity eventually  
44 and necessarily converges because stochastic fluctuations must approach the motor  
45 threshold from below. The degree to which the EEG signal converges prior to action and the  
46 timing of that convergence should depend only on the parameters of the accumulator, and  
47 the temporal structure of the noise input to the accumulator. In contrast, classical models  
48 would attribute the convergence of single trial RPs to consistent precursor processes of  
49 action preparation that reliably precede self-initiated action. While variability of RP activity  
50 has rarely been studied previously (but see (Dirnberger et al., 2008), several studies of  
51 externally-triggered processing have used variability of neural responses to identify neural  
52 codes. For example, variability goes down in the interval between a go-cue and movement  
53 onset (Churchland et al., 2006), and during perceptual processing (He, 2013; Schurger et

54 al., 2015). We thus compared EEG variability prior to self-initiated skip actions with variability  
55 prior to externally-triggered actions occurring at a similar time. We used a systematic  
56 modelling approach to show that a stochastic accumulator framework could indeed explain  
57 the pattern of EEG variability, but only by assuming an additional process modulating the  
58 level of neural noise.

## 59 **2. Materials and Methods**

### 60 *2.1. Participants.*

61 24 healthy volunteers, aged 18-35 years of age (9 male, mean age = 23 years), were  
62 recruited from the Institute of Cognitive Neuroscience subject data pool. Two participants  
63 were excluded before data analysis (they provided insufficient EEG data because of  
64 excessive blinking). All participants were right handed, had normal or corrected to normal  
65 vision, had no history or family history of seizure, epilepsy or any neurologic or psychiatric  
66 disorder. Participants affirmed that they had not participated in any brain stimulation  
67 experiment in the last 48 h, nor had consumed alcohol in the last 24 h. Participants were  
68 paid an institution-approved amount for participating in the experiment. Experimental design  
69 and procedure were approved by the UCL research ethics committee, and followed the  
70 principles of the Declaration of Helsinki.

### 71 *2.2. Behavioural task and procedure.*

72 Participants were placed in an electrically shielded chamber, 55 cm in front of a computer  
73 screen (60 Hz refresh rate). After signing the consent form, the experimental procedure was  
74 explained and the EEG cap was set up. The behavioural task was as follows: participants  
75 were instructed to look at a fixation cross in the middle of the screen. The colour of the  
76 fixation cross changed slowly and continuously throughout the trial. This colour always  
77 started from 'black' and then gradually changed to other colours in a randomised order. The  
78 fixation cross changed colour gradually (e.g., from green to pink), taking 2.57 s. The fixation  
79 cross was initially black, but the sequence of colours thereafter was random. At the same

80 time, participants waited for a display of randomly moving dots (displayed within a circular  
81 aperture of  $7^\circ$  of diameter with a density of 14.28 dots/degree), initially moving with 0%  
82 coherence with a speed of  $2^\circ/\text{s}$  (Desantis et al., 2016a, 2016b), to move coherently (step  
83 change to 100% coherence) towards the left or right. They responded with the left or right  
84 hand by pressing a left or right arrow key on a keyboard, accordingly. The change in dot  
85 motion coherence happened abruptly. Correct responses were rewarded (2p). Conversely,  
86 participants lost money (-1p) for giving a wrong answer (responding with the left hand when  
87 dots were moving to right or vice versa), for responding before dots start moving, or not  
88 responding within 2 s after dot motion. The trial was interrupted while such error feedback  
89 was given. Importantly, the time of coherent movement onset was drawn unpredictably from  
90 an exponential distribution (min = 2 s, max = 60 s, mean = 12 s), so waiting was sometimes  
91 extremely long. However, this wait could be avoided by a 'skip' response (see later).  
92 Participants could lose time by waiting, but receive a big reward (2p) if they responded  
93 correctly, or could save time by 'skipping' but collect a smaller reward (1p) (Fig. 1A). The  
94 experiment was limited to one hour, so using the skip response required a general  
95 understanding of the trade-off between time and money. Participants were carefully informed  
96 in advance of the rewards for responses to dot motion, and for skip responses, and were  
97 clearly informed that the experiment had a fixed duration of one hour.

98 There were two blocked conditions, which differed only in the origin of the skip response. In  
99 the '*self-initiated*' condition blocks, participants could skip waiting if they chose to, by  
100 pressing the left and right response keys simultaneously. The skip response saved time, but  
101 produced a smaller reward (1p) than a response to dot motion. Each block consisted of 10  
102 trials. To ensure consistent visual attention, participants were required to monitor the colour  
103 of the fixation cross, which cycled through an unpredictable sequence of colours. At the end  
104 of each block they were asked to classify the number of times the fixation cross turned  
105 'yellow', according to the following categories: never, less than 50%, 50%, more than 50%.  
106 They lost money (-1p) for giving a wrong answer. At the end of each block, participants

107 received feedback of total reward values, total elapsed time, and number of skips. They  
108 could use this feedback to adjust their behaviour and maximise earnings, by regulating the  
109 number of endogenous ‘skip’ responses.

110 In the ‘*externally-triggered*’ condition blocks, participants could not choose for themselves  
111 when to skip. Instead, they were instructed to skip only in response to an external signal.  
112 The external signal was an unpredictable change in the colour of the fixation cross to ‘red’  
113 (Fig. 1B). Participants were instructed to make the skip response *as soon as* they detected  
114 the change. The time of the red colour appearance was yoked to the time of the participant’s  
115 own previous skip responses in the immediately preceding self-initiated block, in a  
116 randomised order. For participants who started with the externally-triggered block, the timing  
117 of the red colour appearance in the first block only was yoked to the time of the previous  
118 participant’s last self-initiated block. The colour cycle of the fixation cross had a random  
119 sequence, so that the onset of a red fixation could not be predicted. The fixation cross  
120 ramped to ‘red’ from its previous colour in 300 ms. Again, a small reward (1p) was given for  
121 skipping. The trial finished and the participant lost money (-1p) if s/he did not skip within 2.5  
122 s from beginning of the ramping colour of the fixation cross. The ‘red’ colour was left out of  
123 the colour cycle in the self-initiated blocks. To control for any confounding effect of attending  
124 to the fixation cross, participants were also required to attend to the fixation cross in the self-  
125 initiated blocks and to roughly estimate the number of times the fixation cross turned ‘yellow’  
126 (see previous). Each externally-triggered block had 10 trials, and after each block feedback  
127 was displayed. Each self-initiated block was interleaved with an externally-triggered block,  
128 and the order of the blocks was counterbalanced between the participants. The behavioural  
129 task was designed in Psychophysics Toolbox Version 3 (Brainard, 1997).

### 130 2.3. EEG recording.

131 While participants were performing the behavioural task in a shielded chamber, EEG signals  
132 were recorded and amplified using an ActiveTwo Biosemi system (BioSemi, Amsterdam,



133 The Netherlands). Participants wore a 64-channel EEG cap. To shorten the preparation  
134 time, we recorded from a subset of electrodes that mainly covers central and visual areas:  
135 F3, Fz, F4, FC1, FCz, FC2, C3, C1, Cz, C2, C4, CP1, CPz, CP2, P3, Pz, P4, O1, Oz, O2.  
136 Bipolar channels placed on the outer canthi of each eye and below and above the right eye  
137 were used to record horizontal and vertical electro-oculogram (EOG), respectively. The  
138 Biosemi Active electrode has an output impedance of less than 1 Ohm. EEG signals were  
139 recorded at a sampling rate of 2048 Hz.

#### 140 *2.4. EEG preprocessing.*

141 EEG data preprocessing was performed in Matlab (MathWorks, MA, USA) with the help of  
142 EEGLAB toolbox (Delorme and Makeig, 2004). Data were downsampled to 250 Hz and low-  
143 pass filtered at 30 Hz. No high-pass filtering and no detrending were applied, to preserve  
144 slow fluctuations. All electrodes were referenced to the average of both mastoid electrodes.  
145 Separate data epochs of 4 s duration were extracted for self-initiated and externally-  
146 triggered skip actions. Data epochs started from 3 s before to 1 s after the action. To avoid  
147 EEG epochs overlapping each other any trial in which participants skipped earlier than 3 s  
148 from trial initiation was removed. On average, 5% and 4% of trials were removed from the  
149 self-initiated and externally-triggered conditions, respectively.

150 RP recordings are conventionally baseline-corrected by subtracting the average signal value  
151 during a window from, for example, 2.5 until 2 s before action. This involves the implicit  
152 assumption that RPs begin only in the 2 s before action onset (Shibasaki and Hallett, 2006),  
153 but this assumption is rarely articulated explicitly, and is in fact questionable (Verbaarschot  
154 et al., 2015). We instead took a baseline from -5 ms to +5 ms with respect to action onset.  
155 This choice avoids making any assumption about how or when the RP starts. To ensure this  
156 choice of baseline did not capitalize on chance, we performed parallel analyses on  
157 demeaned data (effectively taking the entire epoch as baseline), with consistent results (see  
158 Figure. S3). Finally, to reject non-ocular artefacts, data epochs from EEG channels (not

159 including EOG) with values exceeding a threshold of  $\pm 150 \mu\text{V}$  were removed. On average  
160 7% and 8% of trials were rejected from self-initiated and externally-triggered conditions,  
161 respectively. In the next step, Independent Component Analysis (ICA) was used to remove  
162 ocular artefacts from the data. Ocular ICA components were identified by visual inspection.  
163 Trials with artefacts remaining after this procedure were excluded by visual inspection.

## 164 2.5. EEG analysis.

165 Preliminary inspection showed a typical RP-shaped negative-going slow component that  
166 was generally maximal at FCz. Therefore, data from FCz was chosen for subsequent  
167 analysis. Time series analysis was performed in Matlab (MathWorks) with the help of the  
168 FieldTrip toolbox (Oostenveld et al., 2010). We measured two dependent variables as  
169 precursors of both *self-initiated* and *externally-triggered* skip actions: (1) mean RP amplitude  
170 across trials and (2) variability of RP amplitudes across and within trials, measured by  
171 standard deviation (SD). To compare across-trials SD between the two conditions, data  
172 epochs were divided into four 500 ms windows, starting 2 s before action onset: [-2, -1.5 s],  
173 [-1.5, -1 s], [-1, -0.5 s], [-0.5, 0 s]. All p-values were Bonferroni corrected for four  
174 comparisons. To get a precise estimate of the standard error of the difference between  
175 conditions, paired-samples t-tests were performed on jack-knifed data (Efron and Stein,  
176 1981; Kiesel et al., 2008). Unlike the traditional methods, this technique compares variation  
177 of interest across subsets of the total sample rather than across individuals, by temporarily  
178 leaving each subject out of the calculation. In addition, we also performed cluster-based  
179 permutation tests on SD (Maris and Oostenveld, 2007). These involve a priori identification  
180 of a set of electrodes and a time-window of interest, and incorporate appropriate corrections  
181 for multiple comparisons. Importantly, they avoid further arbitrary assumptions associated  
182 with selecting specific sub-elements of the data of interest, such as individual electrodes,  
183 time-bins or ERP components. The cluster-based tests were performed using the following  
184 parameters: time interval = [-2 - 0 s relative to action], minimum number of neighbouring  
185 electrodes required = 2, number of draws from the permutation distribution = 1000.

186 To measure variability of RP amplitudes within each individual trial, the SD of the EEG signal  
187 from FCz was measured across time in a 100 ms window. This window was applied  
188 successively in 30 time bins from the beginning of the epoch (3 s prior to action) to the time  
189 of action onset. We used linear regression to calculate the slope of the within-trial SD as a  
190 function of time (Figure. 6A). This was performed separately for each trial and each  
191 participant. Slopes greater than 0 indicate that EEG within the 100 ms window becomes  
192 more variable with the approach to action onset. Finally, we compared slopes of this within-  
193 trial SD measure between self-initiated and externally-triggered conditions in a multilevel  
194 model with single trials as level 1 and participants as level 2 variables. Multilevel analysis  
195 was performed in R (R Core Team, Vienna, Austria).

196 Time-frequency analysis was performed with custom written Matlab scripts. The  
197 preprocessed EEG time series were decomposed into their time-frequency representation by  
198 using Complex Morlet wavelets with 20 frequencies, ranging linearly from 5 to 30 Hz. The  
199 number of wavelet cycles increased from 3 to 7 in the same number of steps used to  
200 increase the frequency of the wavelets from 5 to 30 Hz. Power at each trial, each frequency  
201 and each time point was measured by convolving the raw time series with the wavelet and  
202 squaring the resulting complex number. The power at each frequency and each time point  
203 was then averaged across trials for each participant. Edge artefacts were removed by  
204 discarding the first and last 500 ms of the epoch. Baseline time window was defined as the  
205 first 500 ms of the epoch (after removal of edge artefacts: 2.5 - 2 s prior to skip action).  
206 Changes in power during action preparation were subsequently expressed as the  
207 percentage of change relative to the average power during the baseline time window, across  
208 time at a specific frequency. Baseline normalisation was performed by using the following  
209 equation:

$$percentage_{tf} = 100 \frac{power_{tf} - \overline{baseline}_f}{\overline{baseline}_f}$$

210

211 Values  $> 0$  indicates that power at a specific frequency ( $f$ ) and a specific time ( $t$ ) is higher  
212 relative to the average power at the same frequency during the first 500 ms of the epoch.  
213 Finally, we asked whether percentage change in power relative to baseline differs between  
214 self-initiated and externally-triggered skip conditions in the beta band (15 – 30 Hz). Beta  
215 band Event-related Desynchronization (ERD) during action preparation is a well-established  
216 phenomenon (Bai et al., 2005; Doyle et al., 2005; Pfurtscheller and Lopes da Silva, 1999).  
217 Beta power was calculated in a 500 ms window starting from 1 s and ending 0.5 s prior to  
218 skip action. We avoided analysing later windows (e.g., 0.5 - 0 s prior to action) to avoid  
219 possible contamination from action execution following presentation of the red fixation cross  
220 that cued externally-triggered responses. The average normalised power across all pixels  
221 within the selected window was then calculated for each participant and compared across  
222 conditions using paired-samples t-tests.

## 223 *2.6. Modelling and simulations.*

224 All simulations were done in Matlab (MathWorks). We used a modified version of the Leaky  
225 Stochastic Accumulator Model (Usher and McClelland, 2001), in which the activity of  
226 accumulators increases stochastically over time but is limited by leakage.

$$227 \quad \delta x = (I - kx)\Delta t + c\xi\sqrt{\Delta t}$$

228 Where  $I$  is drift rate,  $k$  is leak (exponential decay in  $x$ ),  $\xi$  is Gaussian noise,  $c$  is noise scaling  
229 factor, and  $\Delta t$  is the discrete time step (we used  $\Delta t = 0.001$ ). This leaky stochastic  
230 accumulator has been used previously to model the neural decision of ‘when’ to move in a  
231 self-initiated movement task (Schurger et al., 2012). In that experiment,  $I$  was defined as the  
232 general imperative to respond (with a constant rate). This imperative, if appropriately small in  
233 magnitude, moves the baseline level of activity closer to the threshold, but not over it. Thus,  
234 imperative alone does not trigger action, but does increase the likelihood of a random  
235 threshold-crossing event triggering action. In the original model,  $c$  was assumed to be  
236 constant and was fixed at 0.1. In a departure from the original model, we assumed that the

237 noise scaling factor could change linearly from an initial value of  $c_1$  to a final value of  $c_2$ ,  
238 during action preparation. Consequently,  $\Delta c$  was defined as the magnitude of change in the  
239 noise scaling factor during the trial.

$$240 \quad \Delta c = c_2 - c_1$$

241 A negative  $\Delta c$  means that the signal becomes less noisy as it approaches the threshold for  
242 action. Therefore, the modified model in our experiment had five free parameters:  $I$ ,  $k$ ,  $c_1$ ,  $c_2$   
243 and threshold.

$$244 \quad \delta x = (I - kx)\Delta t + c_t \xi \sqrt{\Delta t}$$

245 Where  $c_t$  is noise scaling factor at time  $t$ . The threshold was expressed as a percentile of the  
246 output amplitude over a set of 1000 simulated trials (each of 50,000 time steps each).  
247 Epochs of simulated data were matched to epochs of actual EEG data by identifying the  
248 point of first threshold crossing event within each simulated trial and then extracting an  
249 epoch from 3000 time steps before to 1000 time steps after the threshold crossing.

250 Parameter estimation for self-initiated skip actions was performed by fitting the model  
251 against the *real mean* RP amplitude of each participant in the self-initiated condition. First,  
252 1000 unique trials of Gaussian noise, each 50,000 time steps, were generated for each  
253 participant and were fed into the model. The initial values of the model's parameters were  
254 derived from a previous study (Schurger et al., 2012). The output of the model was then  
255 averaged across trials and was down-sampled to 250 Hz to match the sampling rate of the  
256 real EEG data. A *least squares* approach was used to minimise root mean squared deviation  
257 (RMSD) between the *simulated* and *real mean* RP, by adjusting the free parameters of the  
258 model for each participant (by using the MATLAB 'fminsearch' function). Note that this  
259 procedure optimised the model parameters to reproduce the mean RP, rather than individual  
260 trials.

261 To fit the model to our externally-triggered skip condition, we fixed the threshold of each  
262 participant at their best fitting threshold from the self-initiated condition. We wanted to keep

263 the threshold the same in both conditions so that we could test the effect of changing noise  
264 levels for a given threshold. Importantly, we also fixed the value of  $c_1$  at its optimal value  
265 form the self-initiated condition. By using this strategy, we can ask how noisiness of the  
266 signal *changes*, from its initial value, and we can compare this change in noise between  
267 conditions. We additionally performed parallel simulations without the assumption of a  
268 common initial noise level, and obtained essentially similar results. Specifically,  $\Delta c$  in the all-  
269 parameter-free model (mean= 0.02, SD = 0.06) was similar to the  $\Delta c$  in the model with  $c_1$   
270 and threshold fixed (mean= 0.02, SD = 0.05). The remaining parameters ( $l$ ,  $k$ ,  $c_2$ ) were  
271 optimised by minimising the deviation between the *simulated mean* RP and the *real mean*  
272 RP in the externally-triggered condition.

273 Finally, we tested the model on the across-trial variability of RP epochs, having *fitted* the  
274 model parameters to the mean RP. All parameters of the model were fixed at each  
275 participant's optimised values for the self-initiated condition, and for the externally-triggered  
276 condition respectively. The model was run 44 times (22 participants, x 2 conditions) with the  
277 appropriate parameters, and 1000 separate trials were generated, each corresponding to a  
278 putative RP exemplar. The Gaussian noise element of the model ensured that these 1000  
279 exemplars were non-identical. The standard deviation across trials was calculated from  
280 these 1000 simulated RP exemplars, for each participant and each condition. Importantly,  
281 this procedure fits the model to each participant's *mean* RP amplitude, but then tests the fit  
282 on the *standard deviation* across the 1000 simulated trials. Finally, to assess similarity  
283 between the real and predicted SD reduction, the predicted SD in self-initiated and  
284 externally-triggered conditions was plotted as a function of time and the area between the  
285 two curves was computed. We then compared the area between the SD curves in a 2 s  
286 interval prior to self-initiated and externally-triggered conditions for all participants' simulated  
287 data, and actual data (Figure 5), using Pearson's correlation.

### 288 **3. Results**

#### 289 *3.1. Behavioural data.*

290 Participants (n=22) waited for a display of random dots to change from 0% to 100% coherent  
291 motion to the left or right. They responded by pressing a left or right arrow key on a  
292 keyboard, accordingly, receiving a reward for correct responses. However, the time of  
293 movement onset was drawn unpredictably from an exponential distribution, so waiting times  
294 could be sometimes extremely long. In the '*self-initiated*' condition blocks (Figure 1A),  
295 participants could choose to skip waiting, by pressing both left and right response keys  
296 simultaneously. This produced a smaller reward than a response to coherent dot motion.  
297 Participants were informed that the experiment was limited to one hour, so that appropriate  
298 use of the skip response implied a general understanding of the trade-off between time and  
299 money.

300 Crucially, this design meant that the skip response reflected a purely endogenous decision  
301 to act, without any direct external instruction or imperative stimulus, but rather reflecting the  
302 general trade-off between smaller, earlier vs later, larger rewards (Green and Myerson,  
303 2004). This operational definition of volition captures some important features of voluntary  
304 control, such as the link between internally-generated action and a general understanding of  
305 the distributional landscape for reasons-based decision-making (Schüür and Haggard,  
306 2011).

307 We compared self-initiated skip decisions to skips in '*externally-triggered*' blocks, where  
308 participants could not choose for themselves when to skip. Instead, they were *instructed* to  
309 make skip responses by a change in the fixation cross colour (Figure 1B) (see materials and  
310 methods), yoked to the time of their own volitional skip decisions in previous blocks. Thus,  
311 self-initiated and instructed blocks were behaviourally identical, but differed in that  
312 participants had internal control over the hazard function in the former, but not the latter  
313 condition.

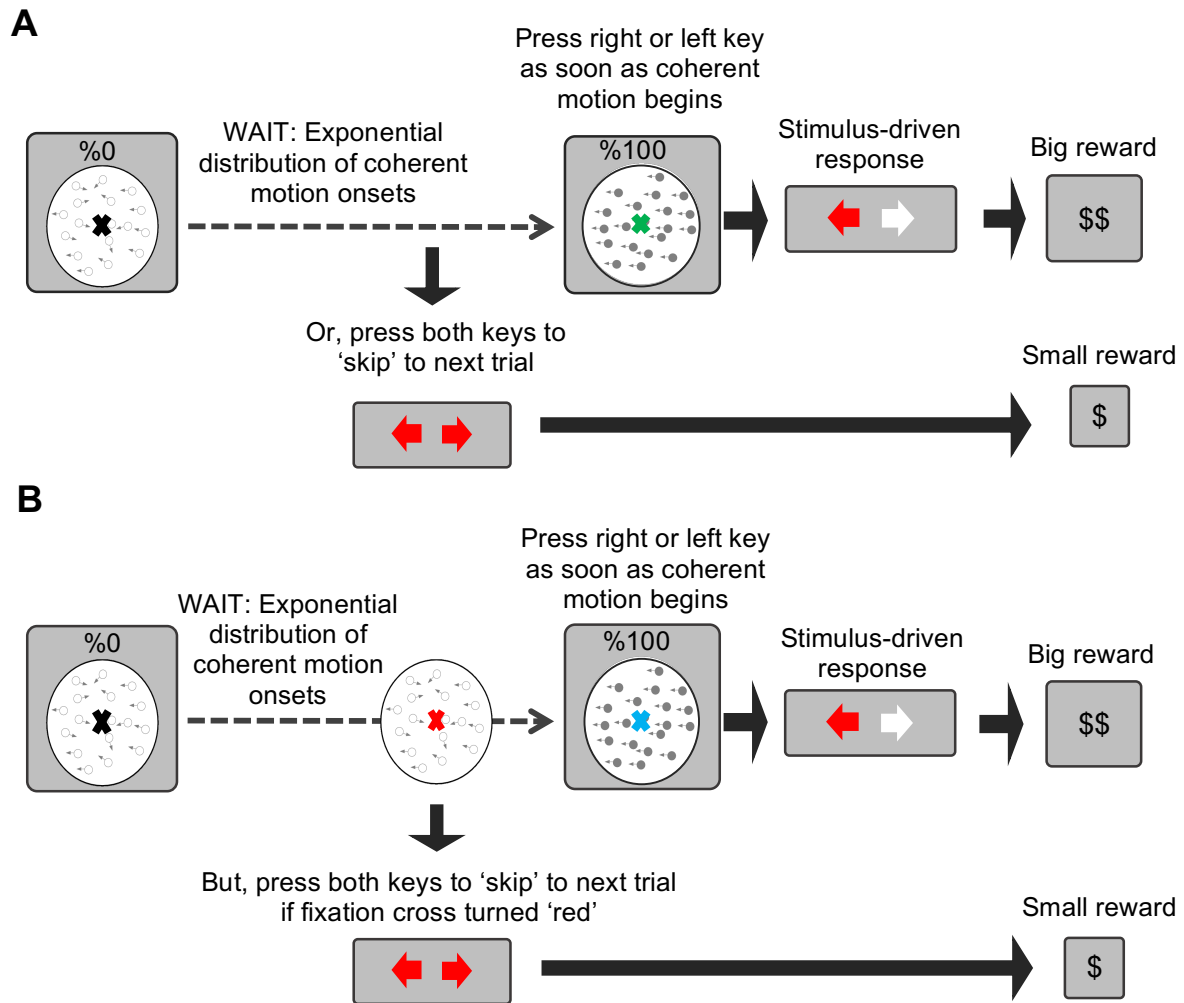

314 ✖ Fixation cross changes colour during the trial 

315 Figure 1. Timeline of an experimental trial. Participants responded to the direction of dot-motion with  
 316 left and right keypresses. Dot-motion could begin unpredictably, after a delay drawn from an  
 317 exponential distribution. A. In the 'self-initiated' blocks participants waited for an unpredictably  
 318 occurring dot-motion stimulus, and were rewarded for correct left-right responses to motion  
 319 direction. They could decide to skip long waits for the motion stimulus, by making a bilateral  
 320 keypress. They thus decided between waiting, which lost time but brought a large reward, and  
 321 'skipping', which saved time but brought smaller rewards. The colour of the fixation cross changed  
 322 continuously during the trial, but was irrelevant to the decision task. B. In the 'externally-triggered'  
 323 blocks, participants were instructed to make bilateral skip keypresses when the fixation cross became  
 324 red, and not otherwise.

325

326 On average participants skipped 108 (SD = 16) and 106 (SD = 17) times in the self-initiated  
 327 and externally-triggered conditions, respectively. They responded to coherent dot motion in



328 the remaining trials ( $N = 177$ ,  $SD = 61$ ), with a reaction time of 767 ms ( $SD = 111$  ms).  
329 Those responses were correct on 86% ( $SD = 4\%$ ) of trials. The average waiting time before  
330 skipping in the self-initiated condition (7.3 s,  $SD = 1.6$ ) was similar to that in the externally-  
331 triggered condition (7.6 s,  $SD = 1.6$ ), confirming the success of our yoking procedure (see  
332 materials and methods). The SD across trials had a mean of 3.17 s ( $SD$  across participants  
333 = 1.42 s) for self-initiated skips. Our yoking procedure ensured similar values for externally-  
334 triggered skips (mean of  $SD$  across trials 3.15 s,  $SD = 1.43$  s). In the externally-triggered  
335 condition, the average reaction time to the fixation cross change was 699 ms ( $SD = 67$  ms).  
336 On average participants earned £2.14 ( $SD = £0.33$ ) from skipping and £2.78 ( $SD = £0.99$ )  
337 from correctly responding to dot motion stimuli. This reward supplemented a fixed fee for  
338 participation. The mean and distribution of waiting time before skip actions of each  
339 participant are presented in Table S1 and Figure S1.

340 *3.2. EEG variability decreases disproportionately prior to action in self-initiated and*  
341 *externally-triggered conditions.*

342 EEG data were pre-processed and averaged separately for self-initiated and externally-  
343 triggered conditions (see materials and methods for full details). Figure 2A shows the grand  
344 average RP amplitude in both conditions (see Figure S2A for the relation between RP-peak  
345 amplitude and waiting time before skipping). The mean RP for self-initiated actions showed  
346 the familiar negative-going ramp. Note that our choice to baseline-correct at the time of the  
347 action itself (see materials and methods and Figure S3) means that the RP never in fact  
348 reaches negative voltage values. This negative-going potential is absent from externally-  
349 triggered skip actions (Jahanshahi et al., 1995; Papa et al., 1991). The morphology of the  
350 mean RP might simply reflect the average of stochastic fluctuations, rather than a goal-  
351 directed build-up. However, these theories offer differing interpretations of the variability of  
352 individual EEG trajectories across trials (see intro).

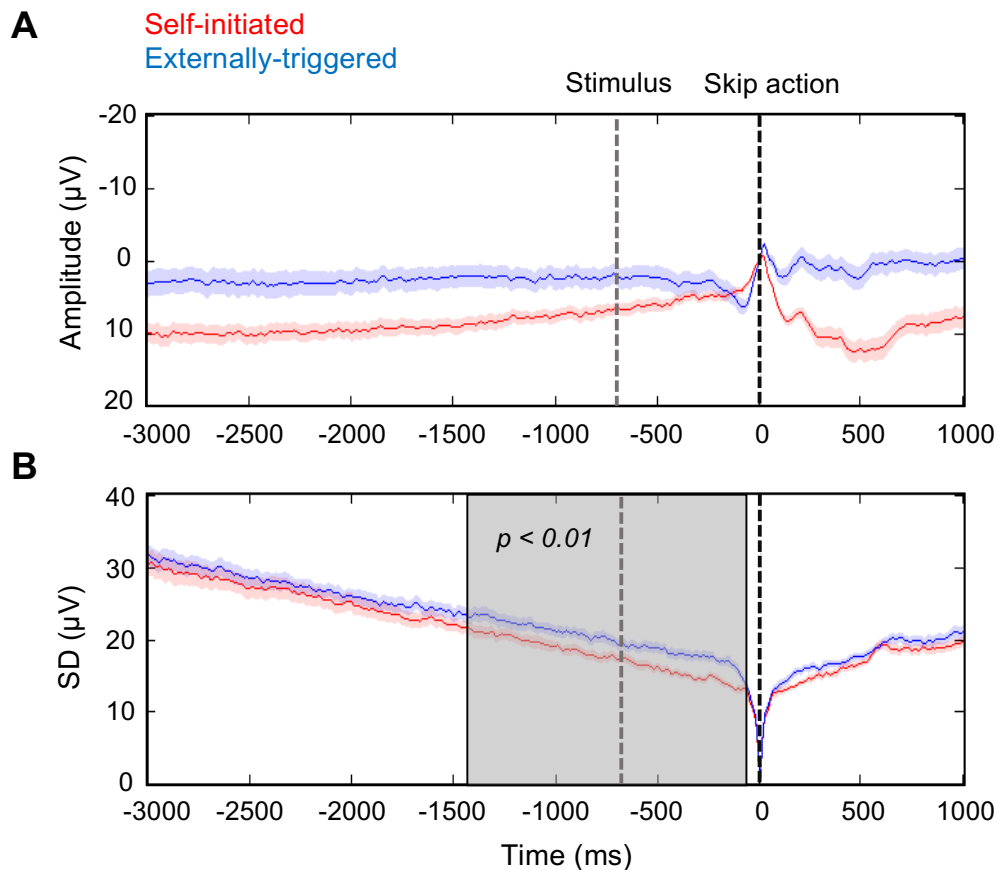

353

354 Figure 2. EEG activity prior to skip actions. The red and blue lines represent self-initiated and  
 355 externally-triggered skip conditions, respectively. Data is time-locked to the skip action (black vertical  
 356 line), baseline-corrected in a 10 ms window around the skip, and recorded from FCz electrode. The  
 357 average time of the skip instruction (fixation cross changing to red) in the externally-triggered  
 358 condition is shown as a grey vertical line. A. Grand average RP amplitude  $\pm$  standard error of the  
 359 mean across participants (SEM). B. Standard deviation across trials averaged across participants  $\pm$   
 360 SEM. Shaded grey area shows a significant difference between standard deviation traces across  
 361 central electrodes, detected by cluster-based permutation test.

362 To investigate this distribution we computed standard deviation of individual trial EEG, and  
 363 found a marked decrease prior to self-initiated skip action. This decrease is partly an artefact  
 364 of the analysis technique: individual EEG epochs were time-locked and baseline-corrected at  
 365 action onset, making the across-trial standard deviation at the time of action necessarily zero  
 366 (but see Figure S3). However, this pre-movement drop in EEG standard deviation was more  
 367 marked for self-initiated than for externally-triggered skip actions, although the analysis  
 368 techniques were identical. Paired-samples t-test on jack-knifed data showed that this  
 369 difference in SD was significant in the last three of the four pre-movement time bins before

370 skip actions (see materials and methods): that is from -1.5 to -1 s ( $t(21) = 4.32$ ,  $p < 0.01$ ,  $d_z$   
371  $= 0.92$ ,  $p$  values are Bonferroni corrected for four comparisons), -1 to -0.5 s ( $t(21) = 5.97$ ,  $p <$   
372  $0.01$ ,  $d_z = 1.27$ ), and -0.5 to 0 s ( $t(21) = 5.39$ ,  $p < 0.01$ ,  $d_z = 1.15$ ).

373 To mitigate any effects of arbitrary selection of electrodes or time-bins, we also performed  
374 cluster-based permutation tests (see materials and methods). For the comparison between  
375 SDs prior to self-initiated vs externally-triggered skip actions, a significant cluster ( $p < 0.01$ )  
376 was identified extending from 1488 to 80 ms premovement (Figure 2B, see also Figure S3  
377 for a different baseline and Figure S2B for the relation between EEG convergence and  
378 waiting time before skipping). This suggests that neural activity gradually converges towards  
379 an increasingly reliable pattern prior to self-initiated actions. Importantly, this effect is not  
380 specific to FCz but could be observed over a wide cluster above central electrodes (Figure  
381 S4). However, the bilateral skip response used here makes the dataset suboptimal for  
382 thoroughly exploring the fine spatial topography of these potentials, which we hope to  
383 address in future research.

384 We also analysed mean and SD EEG amplitude prior to stimulus-triggered responses to  
385 coherent dot motion (as opposed to skip responses). Importantly, because coherent dot-  
386 motion onset is highly unpredictable, any *general* difference in brain state between the self-  
387 initiated skip blocks and the externally-triggered skip blocks should also be apparent prior to  
388 coherent dot-motion onset. We did not observe any negative-going potential prior to  
389 coherent dot motion (Figure 3A). More importantly, the SD of EEG prior to coherent dot  
390 motion onset did not differ between conditions in any time window ( $p > 0.5$ , Bonferroni  
391 corrected for four comparisons) (Figure 3B). This suggests that the disproportionate drop in  
392 SD prior to skip actions (Figure 2) cannot be explained by some general contextual  
393 difference between the two conditions, such as differences in expectation of dot stimuli, task  
394 difficulty, temporal monitoring related to discounting and hazard function. If the decreased  
395 variability prior to self-initiated skips had merely reflected a background, contextual process  
396 of this kind, low variability should also be present when this process was unpredictably

397 interrupted by coherent dot motion. However, this was not found. Rather, reduced variability  
398 was associated only with the period prior to self-initiated action (Figure 2), and not with any  
399 difference in background cognitive processing between the conditions (Figure 3).

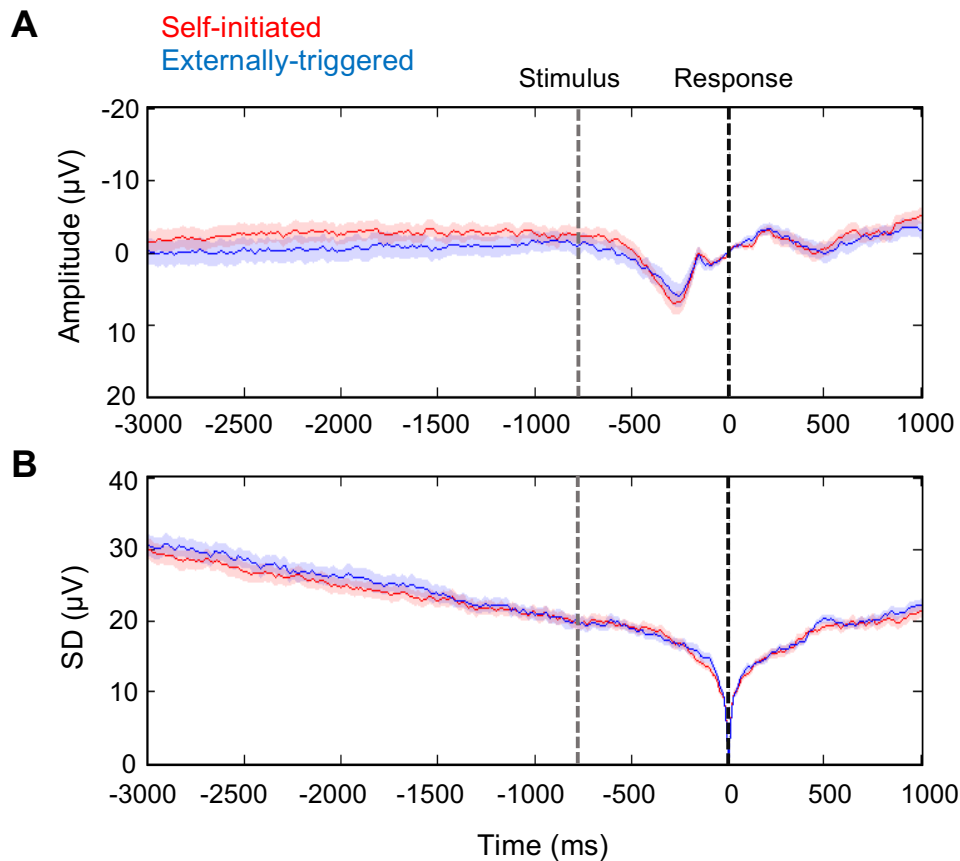

400

401 Figure 3. EEG activity prior to response to coherent dot motion direction. The red and blue lines  
402 represent activity in self-initiated and externally-triggered blocks, respectively. Data is time-locked to  
403 the response to coherent dot motion direction (black vertical line), baseline-corrected in a 10 ms  
404 window around the response, and recorded from FCz electrode. The average time of the coherent dot  
405 motion onset is shown as a grey vertical line. A. Grand average ERPs  $\pm$  SEM across participants. B.  
406 Standard deviation across trials, averaged across participants  $\pm$  SEM across participants.

407

408 Finally, variability in the reaction time to respond to externally-triggered skip cues could  
409 potentially smear out stimulus-driven preparation of skip actions. Such jitter in RT would  
410 have the artefactual effect of increasing EEG variability across trials. To rule out this  
411 possibility we checked whether across-trial EEG convergence was correlated across  
412 participants with variability in behavioural reaction time to the skip response cue, but found

413 no significant correlation between the two variables. This suggests that the difference in  
414 EEG convergence between self-initiated and externally-triggered skip conditions could not  
415 be explained by mere variability in RT to skip cues (Figure S5).

### 416 3.3. Modelling the converging EEG distribution of self-initiated actions.

417 Leaky stochastic accumulator models have been used previously to explain the neural  
418 decision of 'when' to move in a self-initiated task (Schurger et al., 2012). A general  
419 imperative to perform the task shifts premotor activity up closer to threshold and then a  
420 random threshold-crossing event provides the proximate cause of action. Hence, the precise  
421 time of action is driven by accumulated internal physiological noise, and could therefore be  
422 viewed as random, rather than decided (Schurger et al., 2012). However, the across-trial  
423 variability of cortical potentials in our dataset suggests that neural activity converges on a  
424 fixed pattern prior to self-initiated actions, to a greater extent than for externally-triggered  
425 actions. This differential convergence could reflect a between-condition difference in the  
426 autocorrelation function of the EEG. The early and sustained additional reduction in SD  
427 before self-initiated actions motivated us to hypothesise an additional process of noise  
428 control associated with self-initiated actions.

#### 429 3.3.1. Sensitivity analysis

430 To investigate this hypothesis we first performed a sensitivity analysis by investigating how  
431 changing key parameters of the model could influence across-trial variability of the output  
432 (for details see materials and methods). We modelled the hypothesised process of noise  
433 control by allowing a gradual *change in noise* ( $\Delta c$ ) prior to action. We also explored how  
434 changes in the key *drift* ( $l$ ) and *leak* ( $k$ ) parameters would influence the trial-to-trial variability  
435 of RP. We gradually changed each parameter while holding the others fixed, and simulated  
436 RP amplitude in 1000 trials time locked to a threshold-crossing event. SD was then  
437 measured across these simulated trials. Simulated across-trial SDs showed that lower drift  
438 rates and shorter leak constants were associated with a higher across-trial SD. Conversely,

439 reductions in noise were associated with a lower across-trial SD (Figure 4A-C). Thus, for the  
440 model to reproduce the differential EEG convergence found in our EEG data, either the *drift*  
441 or the *leak* should be higher, or the *change in noise* parameter should be lower, in self-  
442 initiated compared to externally-triggered skip action conditions.

### 443 3.3.2. Model fitting and optimal parameters

444 We next fitted the model on the mean RP amplitude of each participant, separately for the  
445 self-initiated and externally triggered conditions (Table S2, S3). The best fitting parameters  
446 were then compared between the two conditions. The *drift* was significantly lower ( $t(21) = -$   
447  $4.47$ ,  $p < 0.001$ , after Bonferroni correction for the three parameters tested) in the self-  
448 initiated (mean across participants =  $0.09$ ,  $SD = 0.03$ ) compared to the externally-triggered  
449 condition (mean across participants =  $0.13$ ,  $SD = 0.04$ ) (Figure 4D). The *leak* was also  
450 significantly lower ( $t(21) = -4.20$ ,  $p < 0.001$ , Bonferroni corrected) in the self-initiated (mean  
451 across participants =  $0.40$ ,  $SD = 0.21$ ) compared to the externally-triggered condition (mean  
452 across participants =  $0.58$ ,  $SD = 0.20$ ) (Figure 4E). The *change in noise* was negative in the  
453 self-initiated (mean across participants =  $-0.03$ ,  $SD = 0.05$ ) but positive in the externally-  
454 triggered condition (mean across participants =  $0.02$ ,  $SD = 0.05$ ). This difference was  
455 significant between the conditions ( $t(21) = -5.38$ ,  $p < 0.001$ , Bonferroni corrected) (Figure  
456 4F). Finally, to investigate which parameters were most sensitive to the difference between  
457 self-initiated and externally-triggered conditions, we expressed the effect of condition on  
458 each parameter as an effect size (standardized mean difference, Cohen's  $d_z$ ). Importantly,  
459 the effect size for the between-condition difference in the *change in noise* parameter ( $d_z =$   
460  $1.15$ ,  $95\%CI = [0.60\ 1.68]$ ) was larger than that for the *drift* ( $d_z = 0.95$ ,  $95\%CI = [0.44\ 1.45]$ )  
461 or the *leak* ( $d_z = 0.89$ ,  $95\%CI = [0.39\ 1.38]$ ) parameters (Figure 4G).

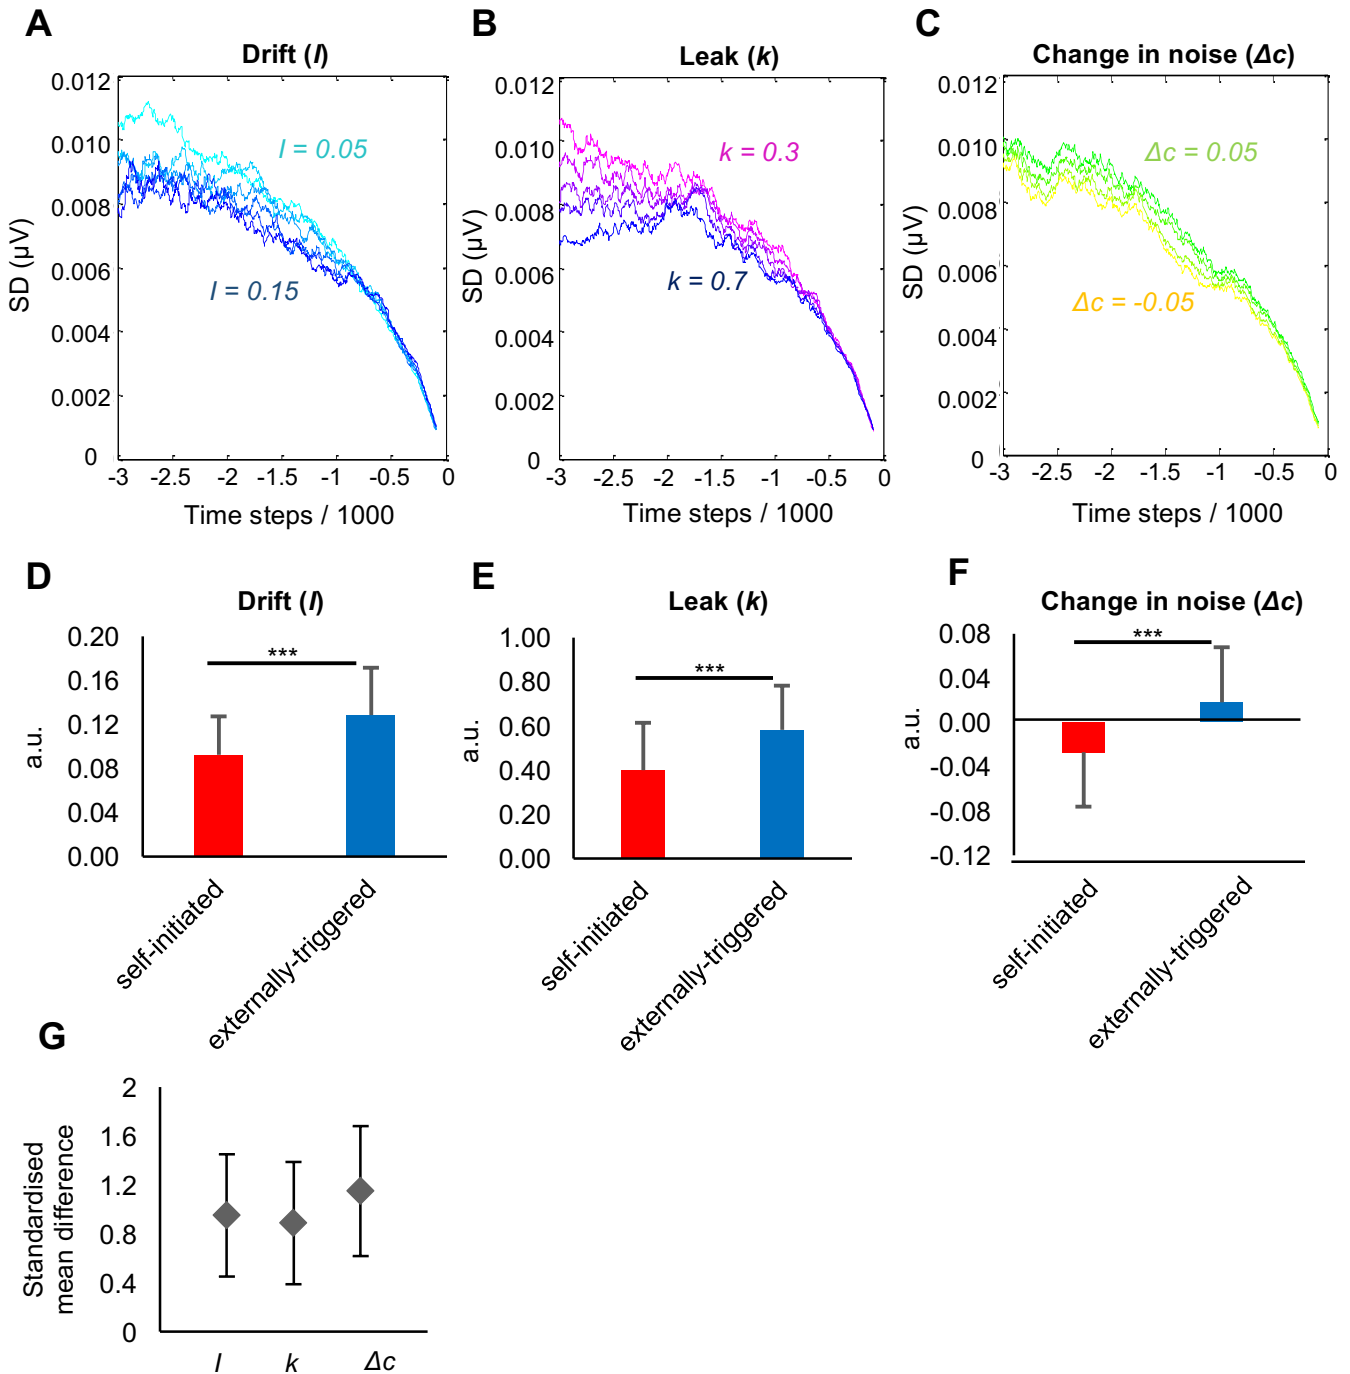

462  
 463 Figure 4 A-C. Results of sensitivity analysis. Effects of changing parameters of a stochastic  
 464 accumulator model on SD across 1000 model runs. (A) *Drift* gradually changed from 0.05 (cyan) to  
 465 0.15 (blue) in 0.02 steps, while other parameters were kept fixed. (B) *Leak* gradually changed from  
 466 0.3 (magenta) to 0.7 (blue) in 0.1 steps, while other parameters were kept fixed. (C) *Change in noise*  
 467 gradually changed from -0.05 (yellow) to 0.05 (green) in 0.02 steps, while other parameters were kept  
 468 fixed. D-F. The best fitting parameters to real mean RP amplitude in self-initiated (red) and externally-  
 469 triggered (blue) conditions. Asterisks show significant difference ( $p < 0.001$ ). Error bars show SD  
 470 across participants. G. Effect sizes ( $d_z$ ) for the between-condition difference in fitted *drift*, the *leak* and  
 471 the *change in noise* parameters. Error bars show 95% confidence interval.

472 So far, we fitted model parameters to the mean RP amplitude, and noted through separate  
 473 sensitivity analysis their implications for across-trial SD. Next, we directly predicted the drop  
 474 in across-trial SD of simulated RP data in self-initiated compared to externally-triggered  
 475 conditions, using the optimal model parameters for each participant in each condition. We  
 476 therefore simulated 22 RP data sets, using each participant's best fitting parameters in each  
 477 condition (see materials and methods), and computed the SD across the simulated trials. We  
 478 observed a marked additional drop in simulated across-trial SD in the self-initiated compared  
 479 to externally-triggered condition (Figure 5A, B). The differential convergence between  
 480 conditions in the simulated data closely tracked the differential convergence in our EEG data  
 481 (Correlation across participants, Pearson's  $r = 0.90$ ,  $p < 0.001$ ) (Figure 5C).

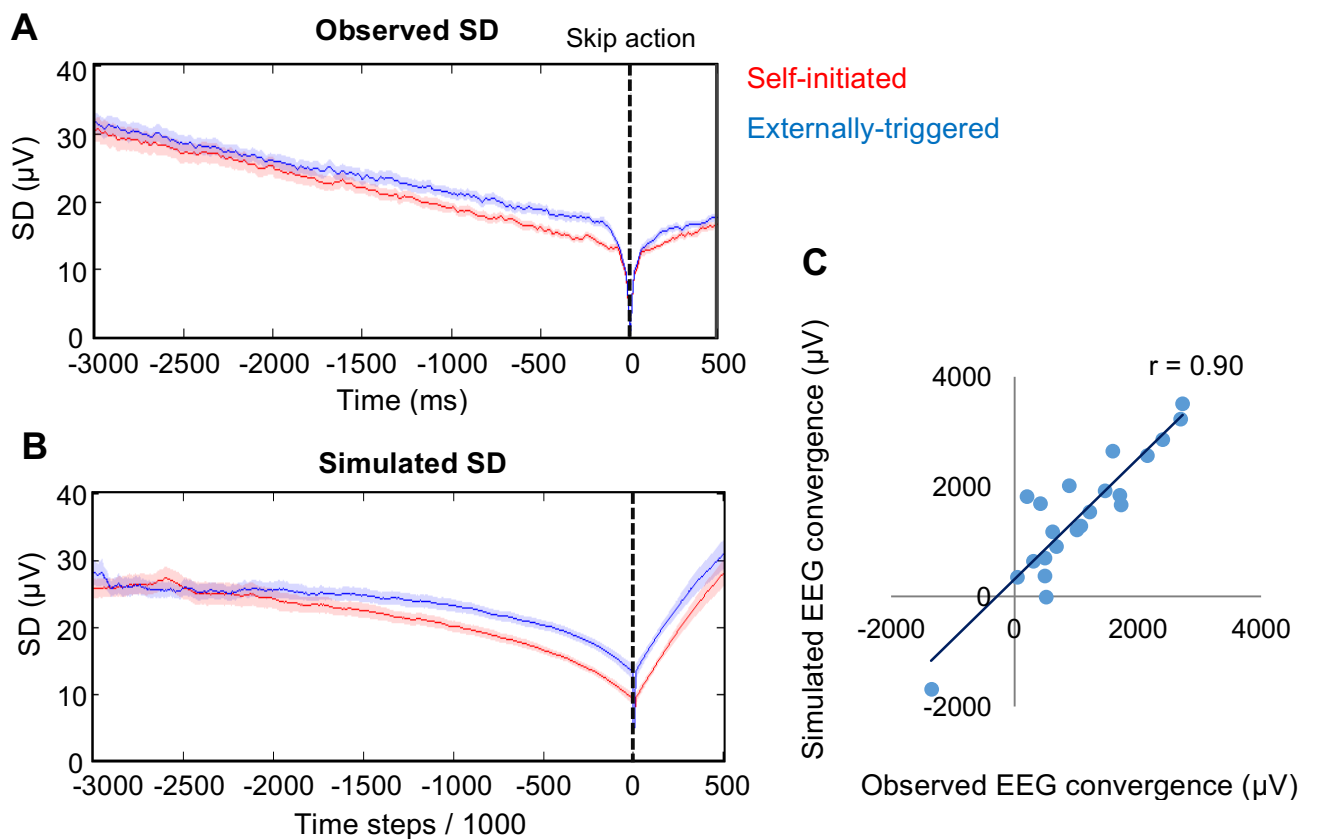

482  
 483 Figure 5. (A) Observed SD across trials averaged across participants  $\pm$  SEM. Data are baselined to a  
 484 10 ms window around the skip and are recorded from FCz electrode. (B) Simulated SD across trials  
 485 averaged across participants  $\pm$  SEM. The red and blue lines represent activity in self-initiated and  
 486 externally-triggered blocks, respectively. The black vertical line is the moment of skip action. (C)  
 487 Correlation between observed and simulated EEG convergence. EEG convergence was measured by  
 488 subtracting the area under the SD curve in self-initiated from the externally-triggered condition.



489 3.4. Within-trial reduction in EEG variability

490 Optimum parameter values from the model suggest that a consistent process of noise  
491 reduction reliably occurs prior to self-initiated actions. This theory predicts that, compared to  
492 externally-triggered actions, EEG variability should reduce more strongly not only across  
493 trials but also within each single self-initiated action trial. To test this prediction we measured  
494 SD within a 100 ms sliding window for each trial, and each condition (see materials and  
495 methods) (Figure. 6A). We then used linear regression to calculate the slope of the within-  
496 trial SD change for each trial, and compared slopes between the self-initiated and externally-  
497 triggered conditions using a multilevel model with single trials as level 1 and participants as  
498 level 2 variables. While EEG variability decreased within self-initiated skip trials (mean slope  
499 =  $-0.01 \mu\text{V}/\text{sample}$ , SD across participants =  $0.02 \mu\text{V}$ ), it increased within externally-triggered  
500 trials (mean slope =  $0.01 \mu\text{V}/\text{sample}$ , SD across participants =  $0.02 \mu\text{V}$ ). The between-  
501 condition difference in slopes was highly significant ( $t(4102) = 3.39$ ,  $p < 0.001$ ; Figure. 6B),  
502 consistent with a progressive reduction of EEG variability prior to self-initiated actions.

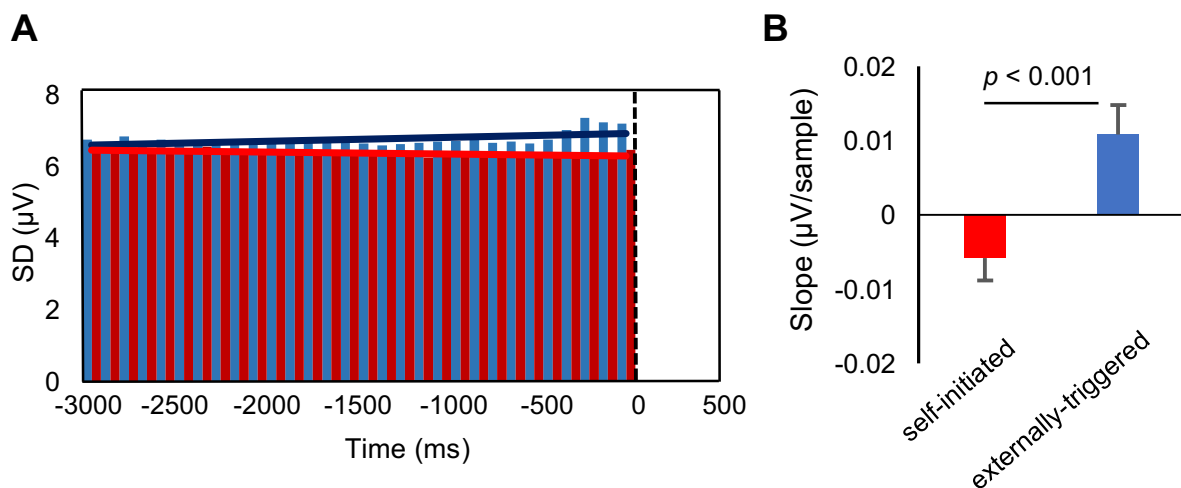

503

504 Figure 6. Within-trial EEG variability. (A) SD was measured within 100ms windows for each trial and  
505 each condition. Red and blue bars show within-trial SD in each time bin in self-initiated and externally-  
506 triggered conditions, respectively. The solid red and blue lines show the linear fit to the time bins in  
507 self-initiated and externally-triggered conditions, respectively. (B) The slope of the change in within-  
508 trial variability was then compared between the self-initiated (red) and externally-triggered (blue) skip  
509 conditions. Error bars show SEM across participants.

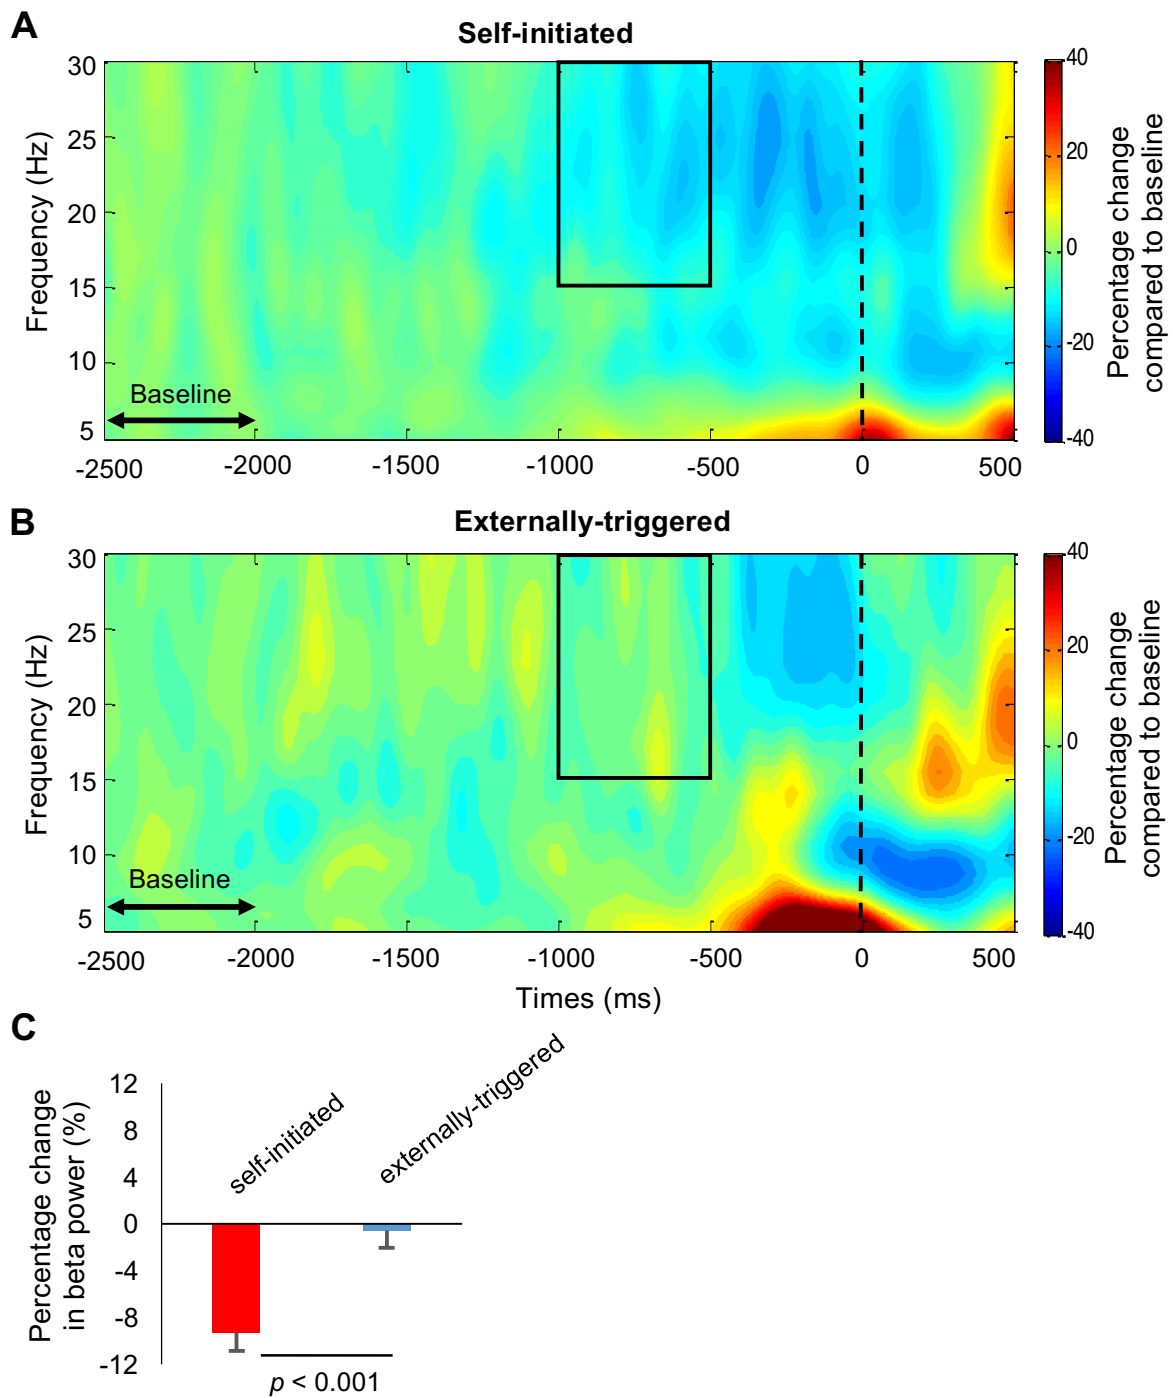

510

511 Figure 7. Percentage change in total EEG power compared to baseline (2.5 – 2 s prior to action) in  
 512 self-initiated (A), and externally-triggered skip conditions (B). In each condition, the percentage  
 513 change in power was computed 1 – 0.5 s prior to skip action, and from 15 – 30 Hz based on previous  
 514 literature (region of interest shown by black box). (C) The percentage change from baseline was  
 515 compared between the self-initiated (red bar) and externally-triggered (blue bar) conditions. Error bars  
 516 show SEM across participants.

517 Previous discussions of amplitude variation in EEG focussed on synchronised activity within  
518 specific spectral bands (Pfurtscheller and Neuper, 1994). Preparatory decrease in beta-band  
519 power has been used as a reliable biomarker of voluntary action (Kristeva et al., 2007).  
520 While time-series methods identify activity that is phase-locked, spectral methods identify  
521 EEG power that is both phase-locked and non-phase-locked, within each specific frequency  
522 band (Cohen, 2014; Pfurtscheller and Lopes da Silva, 1999). Since motor threshold models  
523 simply accumulate all neural activity, whether stochastic or synchronised, we reasoned that  
524 reduction in the noise scaling factor within an accumulator model might be associated with  
525 reduction in the synchronised activity. We therefore also investigated the decreasing  
526 variability of neural activity prior to self-initiated action using spectral methods (see materials  
527 and methods). Specifically, we focused on the event-related desynchronization (ERD) of  
528 beta band activity (Bai et al., 2011; Calmels et al., 2006; Stancák and Pfurtscheller, 1996).  
529 We compared ERD between the self-initiated and externally-triggered conditions in a 500 ms  
530 window (1 – 0.5 s prior to action, based on previous reports (Tzagarakis et al., 2010)). Beta  
531 power in this period decreased prior to self-initiated skip (mean percentage change = -%9.3,  
532 SD = %7.4) (Figure. 7A), but not before externally-triggered skip actions (mean percentage  
533 change = -%0.6, SD = %6.9) (Figure. 7B). Importantly, percentage change in beta power  
534 was significantly different between the two conditions ( $t(21) = -4.16$ ,  $p < 0.001$ ) (Figure 7C).

#### 535 **4. Discussion**

536 The capacity for endogenous voluntary action lies at the heart of human nature, but the brain  
537 mechanisms that enable this capacity remain unclear. A key research bottleneck has been  
538 the lack of convincing experimental paradigms for studying volition. Many existing paradigms  
539 rely on paradoxical instructions equivalent to “be voluntary” or “act freely” (Haggard, 2005;  
540 Libet et al., 1983). In a novel paradigm, we operationalized self-initiated actions as  
541 endogenous ‘skip’ responses embedded in a perceptual decision task, with a long, random  
542 foreperiod. Participants could decide to skip waiting for an imperative stimulus, by  
543 endogenously initiating a bilateral keypress. Although previous studies in animals also used

544 *'Giving up waiting'* to study spontaneous action decisions (Murakami et al., 2014), we  
545 believe this is the first use of this approach to study self-initiated actions in humans.

546 The skip action in our task has many features traditionally associated with volition including  
547 internal-generation (Passingham et al., 2010), reasons-responsiveness (Anscombe, 2000),  
548 freedom from immediacy (Shadlen and Gold, 2004), and a clear counterfactual alternative  
549 (Pereboom, 2011). Crucially, operationalising self-initiated voluntary action in this way avoids  
550 explicit instructions to “act freely”, and avoids subjective reports about “volition”. We  
551 compared such actions to an exogenous skip response to a visual cue in control blocks.

552 The expectation of visual stimulation (coherent dot motion), and the occurrence and timing of  
553 skip responses were all balanced across the two blocks, so the key difference is that  
554 participants had voluntary control over skips in the self-initiated, but not the externally-  
555 triggered blocks. We noted above that voluntary control in turn involves a number of  
556 components, including decision, initiation, and expectation of action. We cannot be certain  
557 how much each of these components contributes to our electrophysiological results.

558 However, these different components are all considered important markers of self-initiated  
559 voluntary action.

560 The neural activity that generates self-initiated voluntary actions remains controversial.  
561 Several theories attribute a key role to medial frontal regions (Kriehoff et al., 2011; Nachev  
562 et al., 2008; Passingham, 1995). Averaged scalp EEG in humans revealed a rising negativity  
563 beginning 1 s or more before the onset of endogenous actions (Kornhuber and Deecke,  
564 1965), and appearing to originate in medial frontal cortex (Boschert et al., 1983; Deecke and  
565 Kornhuber, 1978). Since this ‘readiness potential’ does not occur before involuntary or  
566 externally-triggered movements, it has been interpreted as the electro-physiological sign of  
567 planning, preparation, and initiation of self-initiated actions (Keller and Heckhausen, 1990;  
568 Kornhuber and Deecke, 1990). RP-like brain activities preceding self-initiated actions were  
569 also reported at the single-neuron level (Fried et al., 2011). However, the view of the RP as  
570 a causal signal for voluntary action has been challenged, because simply averaging random

571 neural fluctuations that could trigger movement also produces RP-like patterns (Schurger et  
572 al., 2012). Such stochastic accumulator models were subsequently used to predict humans'  
573 (Schurger et al., 2012) and rats' self-initiated actions in a task similar to ours (Murakami et  
574 al., 2014). Thus, it remains highly controversial whether the RP results from a fixed  
575 precursor process that prepares self-initiated actions, or from random intrinsic fluctuations.  
576 We combined an experimental design that provides a clear operational definition of volition,  
577 and an analysis of distribution of pre-movement EEG *across and within individual trials*. We  
578 report the novel finding that self-initiated movements are reliably preceded by a process of  
579 variability reduction, measured as a decreasing variability in individual trial RPs, over the 1.5  
580 s prior to movement.

581 Importantly, this variability reduction was specifically associated with the premovement  
582 period before a self-initiated action: First, variability reduction was stronger prior to self-  
583 initiated skip actions than prior to externally-triggered skip actions. Second, and crucially, the  
584 variability reduction did not reflect any general contextual factor that might differ between  
585 these two conditions. In our task, the onset of coherent dot motion provides an unexpected  
586 snapshot of the brain state in the specific context provided by each condition, but not at the  
587 time of the skip event. Figure 3 showed that any such *contextual* differences between  
588 conditions did not affect EEG variability, and thus could not explain the reduced variability  
589 prior to self-initiated skip actions. Thus, the reduced variability in our self-initiated skip  
590 condition is linked to the impending action itself, and not to any general difference in the  
591 cognitive processing or task demands between the two conditions. This pattern of results  
592 suggests a neural precursor of self-initiated action, rather than other background contextual  
593 factors unrelated to action preparation.

594 Measurement of inter-trial variability has been extensively used in the analysis of neural data  
595 (Averbeck and Lee, 2003; Churchland et al., 2011, 2010, 2006; He, 2013; Saberi-  
596 Moghadam et al., 2016; Schurger et al., 2015). For example, presenting a target stimulus  
597 decreases inter-trial variability of neural firing rate in premotor cortex (Churchland et al.,

598 2006). Interestingly, RTs to external stimuli are shortest when variability is lowest,  
599 suggesting that a decrease in neural variability is a marker of motor preparation (Churchland  
600 et al., 2006). Moreover, reducing neural variability is characteristic of cortical responses to  
601 any external stimulus (Churchland et al., 2010), and could be a reliable signature of  
602 conscious perception (Schurger et al., 2015). Importantly, in previous studies, the decline in  
603 neural variability was *triggered* by a target stimulus, i.e. decreasing neural variability was  
604 triggered exogenously (Churchland et al., 2010). Our results show that inter-trial variability  
605 also decreases prior to a self-initiated action, in the absence of any external target.

606 Classical models might attribute variability reduction prior to self-initiated action to a  
607 consistent process of preparation. In contrast, stochastic fluctuation models have been  
608 recently used to account for the neural activity preceding self-initiated actions in humans  
609 (Schurger et al., 2012) and rodents (Murakami et al., 2014). We did not aim in this  
610 experiment to compare these models directly, but to investigate their predictions regarding  
611 the shape and variability of the RP. Our modelling showed variability reduction could be  
612 explained within a stochastic fluctuation model, *with the additional assumption* of progressive  
613 decrease in the input noise level. In the absence of external evidence, stochastic models  
614 depend only on internal physiological noise to determine the time of action. Thus, Schurger  
615 et al.'s model first shifts premotor activity closer to a motor threshold, while the actual  
616 threshold-crossing event is triggered by accumulating stochastic fluctuations (Schurger et  
617 al., 2012). By fitting a modified version of the leaky stochastic accumulator model on each  
618 participant's mean RP amplitude, we observed that integration of internal noise evolves  
619 differently prior to self-initiated and externally-triggered skip actions. The rate of the *drift* and  
620 the *leak* was lower and the *change in noise* was negative prior to self-initiated actions,  
621 compared to externally-triggered actions. Importantly, by fitting model parameters to each  
622 participant's mean RP, and testing the variability of EEG data generated with those  
623 parameters, we found that variability reduction before self-initiated action was mainly driven  
624 by a gradually-reducing noise level.

625 Previous studies show that changes in noise level influence choice, RT and confidence in  
626 accumulation-to-bound models of perceptual decision making (Fetsch et al., 2014;  
627 Furstenberg et al., 2015; Kiani et al., 2008; Zylberberg et al., 2016). Interestingly, the  
628 motivating effects of reward on speed and accuracy of behaviour were recently shown to be  
629 attributable to active control of internal noise (Manohar et al., 2015). In general, previous  
630 studies show an important role of active noise control in tasks requiring responses to  
631 external stimuli (Kool and Botvinick, 2013; Manohar et al., 2015). We have shown that  
632 similar processes may underlie self-initiated action, and that a consistent process of noise  
633 reduction may be a key precursor of self-initiated voluntary action. This additional process of  
634 noise control may make a stochastic approach more similar to classical models of voluntary  
635 action.

636 Finally, we showed that a decrease in premotor neural variability prior to self-initiated action  
637 is not only observed across-trials, but is also realised within-trial and as a reduction in EEG  
638 power in the beta frequency band. The observed reduction in beta-band power is entirely  
639 consistent with the proposed reduction in neural noise preceding self-initiated action that  
640 was suggested by our modelling. Clearly, any natural muscular action must have *some*  
641 precursors. Sherrington's final common path concept proposed that descending neural  
642 commands from primary motor cortex necessarily preceded voluntary action (Sherrington,  
643 1906). However, it remains unclear *how long* before action such precursor processes can be  
644 identified. Our result provides a new method for addressing this question. The question is  
645 theoretically important, because cognitive accounts of self-initiated action control divide into  
646 two broad classes. In classical accounts, a fixed, and relatively long-lasting precursor  
647 process is caused by a prior decision to act (Anscombe, 2000; Kornhuber and Deecke,  
648 1990). In other recent accounts, stochastic fluctuations would dominate until a relatively late  
649 stage, and fixed precursor processes would be confined to brief, motoric execution  
650 processes (Schurger et al., 2012).

651 The precursor processes that our method identifies may be necessary for self-initiated  
652 action, but may not be sufficient: identifying a precursor process prior to self-initiated  
653 movement says nothing about whether and how often such a process might also be present  
654 in the absence of movement. On one view, the precursor process might occur quite  
655 frequently, but a last-minute decision might influence whether a given precursor event  
656 completes with a movement, or not. Our movement-locked analyses cannot identify any  
657 putative precursor processes or precursor-like processes that failed to result in a movement.  
658 However, our spectral analyses (Figure 7) make this possibility unlikely. They show a  
659 gradual decline in total beta-band power beginning around 1 s prior to self-initiated action.  
660 Any putative unfulfilled precursor processes would presumably produce partial versions of  
661 this effect throughout the epoch, but these are not readily apparent. Lastly, there might be a  
662 nonlinear relation between the recorded signals and the decision process. Our analyses  
663 assumed a simple, linear relation between the decision process and the measured variables.  
664 This assumption may be simplistic, but almost all analyses of neural data make similar  
665 assumptions at some level.

666 Interestingly, our endogenous skip response resembles the decision to explore during  
667 foraging behaviour (Constantino and Daw, 2015; Kolling et al., 2012). That is, endogenous  
668 skip responses amounted to deciding to look out for dot-motion stimuli in forthcoming time-  
669 periods, rather than the present one. This prompts the speculation that spontaneous  
670 transition from rest to foraging or vice-versa could be an early evolutionary antecedent of  
671 human volition.

672 In conclusion, we show that self-initiated actions have a reliable precursor, namely a  
673 consistent process of neural variability reduction prior to movement. We showed that this  
674 variability reduction was not due to a background contextual process that differed between  
675 self-initiated and externally-triggered conditions, but was related to self-initiated action. We  
676 began this paper by distinguishing between a classical model, in which a fixed preparation  
677 process preceded self-initiated action, and a fully stochastic model, in which the triggering of



678 self-initiated action is essentially random – although the artefact of working with movement-  
679 locked epochs might give the appearance of a specific causal signal such as the RP. We  
680 found that the precursor process prior to self-initiated action could be modelled within a  
681 stochastic framework, given the additional assumption of a progressive reduction in input  
682 noise. Future research might usefully investigate whether the precursor process we have  
683 identified is the cause or the consequence of the subjective ‘decision to act’.

## 684 **5. Author Contributions**

685 Conceptualization, N.K., P.H., A.S., and A.D.; Methodology, N.K., A.S., and A.D.; Formal  
686 Analysis, N.K., L.Z., and P.H.; Investigation, N.K., L.Z.; Writing-original draft, N.K., Writing-  
687 review & editing, P.H., A.S., Supervision, P.H. and A.S.

## 688 **6. Acknowledgement**

689 This work was supported by the European Research Council Advanced Grant HUMVOL  
690 (Grant number: 323943). This work was additionally supported by a grant from  
691 The Leverhulme Trust (Ref. RPG-2016-378) to PH. AS was supported by a starting grant  
692 from the European Research Council (Grant number 640626). The authors declare no  
693 competing financial interest.

## References

- Anscombe, G.E.M., 2000. *Intention*. Harvard University Press.
- Averbeck, B.B., Lee, D., 2003. Neural noise and movement-related codes in the macaque supplementary motor area. *J. Neurosci. Off. J. Soc. Neurosci.* 23, 7630–7641.
- Bai, O., Mari, Z., Vorbach, S., Hallett, M., 2005. Asymmetric spatiotemporal patterns of event-related desynchronization preceding voluntary sequential finger movements: a high-resolution EEG study. *Clin. Neurophysiol. Off. J. Int. Fed. Clin. Neurophysiol.* 116, 1213–1221. doi:10.1016/j.clinph.2005.01.006
- Bai, O., Rathi, V., Lin, P., Huang, D., Battapady, H., Fei, D.-Y., Schneider, L., Houdayer, E., Chen, X., Hallett, M., 2011. Prediction of human voluntary movement before it occurs. *Clin. Neurophysiol. Off. J. Int. Fed. Clin. Neurophysiol.* 122, 364–372. doi:10.1016/j.clinph.2010.07.010
- Boschert, J., Hink, R.F., Deecke, L., 1983. Finger movement versus toe movement-related potentials: further evidence for supplementary motor area (SMA) participation prior to voluntary action. *Exp. Brain Res.* 52, 73–80.
- Brainard, D.H., 1997. The Psychophysics Toolbox. *Spat. Vis.* 10, 433–436.
- Calmels, C., Holmes, P., Jarry, G., Lévèque, J.-M., Hars, M., Stam, C.J., 2006. Cortical activity prior to, and during, observation and execution of sequential finger movements. *Brain Topogr.* 19, 77–88. doi:10.1007/s10548-006-0014-x
- Churchland, A.K., Kiani, R., Chaudhuri, R., Wang, X.-J., Pouget, A., Shadlen, M.N., 2011. Variance as a signature of neural computations during decision making. *Neuron* 69, 818–831. doi:10.1016/j.neuron.2010.12.037
- Churchland, M.M., Yu, B.M., Cunningham, J.P., Sugrue, L.P., Cohen, M.R., Corrado, G.S., Newsome, W.T., Clark, A.M., Hosseini, P., Scott, B.B., Bradley, D.C., Smith, M.A., Kohn, A., Movshon, J.A., Armstrong, K.M., Moore, T., Chang, S.W., Snyder, L.H., Lisberger, S.G., Priebe, N.J., Finn, I.M., Ferster, D., Ryu, S.I., Santhanam, G., Sahani, M., Shenoy, K.V., 2010. Stimulus onset quenches neural variability: a widespread cortical phenomenon. *Nat. Neurosci.* 13, 369–378. doi:10.1038/nn.2501
- Churchland, M.M., Yu, B.M., Ryu, S.I., Santhanam, G., Shenoy, K.V., 2006. Neural Variability in Premotor Cortex Provides a Signature of Motor Preparation. *J. Neurosci.* 26, 3697–3712. doi:10.1523/JNEUROSCI.3762-05.2006
- Cohen, M.X., 2014. *Analyzing Neural Time Series Data: Theory and Practice*, 1 edition. ed. MIT Press, Cambridge, Massachusetts.
- Constantino, S.M., Daw, N.D., 2015. Learning the opportunity cost of time in a patch-foraging task. *Cogn. Affect. Behav. Neurosci.* 15, 837–853. doi:10.3758/s13415-015-0350-y

- Cunnington, R., Windischberger, C., Deecke, L., Moser, E., 2002. The preparation and execution of self-initiated and externally-triggered movement: a study of event-related fMRI. *NeuroImage* 15, 373–385. doi:10.1006/nimg.2001.0976
- Deecke, L., Kornhuber, H.H., 1978. An electrical sign of participation of the mesial “supplementary” motor cortex in human voluntary finger movement. *Brain Res.* 159, 473–476.
- Delorme, A., Makeig, S., 2004. EEGLAB: an open source toolbox for analysis of single-trial EEG dynamics including independent component analysis. *J. Neurosci. Methods* 134, 9–21. doi:10.1016/j.jneumeth.2003.10.009
- Dennett, D.C., 2015. *Elbow Room: The Varieties of Free Will Worth Wanting*, New edition edition. ed. MIT Press, Cambridge, Massachusetts ; London, England.
- Desantis, A., Waszak, F., Gorea, A., 2016a. Agency alters perceptual decisions about action-outcomes. *Exp. Brain Res.* doi:10.1007/s00221-016-4684-7
- Desantis, A., Waszak, F., Moutsopoulou, K., Haggard, P., 2016b. How action structures time: About the perceived temporal order of action and predicted outcomes. *Cognition* 146, 100–109. doi:10.1016/j.cognition.2015.08.011
- Dirnberger, G., Lang, W., Lindinger, G., 2008. A new method to determine temporal variability in the period of pre-movement electroencephalographic activity. *Int. J. Psychophysiol. Off. J. Int. Organ. Psychophysiol.* 70, 165–170. doi:10.1016/j.ijpsycho.2008.08.006
- Doyle, L.M.F., Yarrow, K., Brown, P., 2005. Lateralization of event-related beta desynchronization in the EEG during pre-cued reaction time tasks. *Clin. Neurophysiol. Off. J. Int. Fed. Clin. Neurophysiol.* 116, 1879–1888. doi:10.1016/j.clinph.2005.03.017
- Efron, B., Stein, C., 1981. The Jackknife Estimate of Variance. *Ann. Stat.* 9, 586–596.
- Fetsch, C.R., Kiani, R., Newsome, W.T., Shadlen, M.N., 2014. Effects of Cortical Microstimulation on Confidence in a Perceptual Decision. *Neuron* 83, 797–804. doi:10.1016/j.neuron.2014.07.011
- Fried, I., Mukamel, R., Kreiman, G., 2011. Internally generated preactivation of single neurons in human medial frontal cortex predicts volition. *Neuron* 69, 548–562. doi:10.1016/j.neuron.2010.11.045
- Furstenberg, A., Breska, A., Sompolinsky, H., Deouell, L.Y., 2015. Evidence of Change of Intention in Picking Situations. *J. Cogn. Neurosci.* 1–14. doi:10.1162/jocn\_a\_00842
- Gold, J.I., Shadlen, M.N., 2007. The Neural Basis of Decision Making. *Annu. Rev. Neurosci.* 30, 535–574. doi:10.1146/annurev.neuro.29.051605.113038

- Green, L., Myerson, J., 2004. A Discounting Framework for Choice With Delayed and Probabilistic Rewards. *Psychol. Bull.* 130, 769–792. doi:10.1037/0033-2909.130.5.769
- Haggard, P., 2008. Human volition: towards a neuroscience of will. *Nat. Rev. Neurosci.* 9, 934–946. doi:10.1038/nrn2497
- Haggard, P., 2005. Conscious intention and motor cognition. *Trends Cogn. Sci.* 9, 290–295. doi:10.1016/j.tics.2005.04.012
- He, B.J., 2013. Spontaneous and task-evoked brain activity negatively interact. *J. Neurosci. Off. J. Soc. Neurosci.* 33, 4672–4682. doi:10.1523/JNEUROSCI.2922-12.2013
- Jahanshahi, M., Jenkins, I.H., Brown, R.G., Marsden, C.D., Passingham, R.E., Brooks, D.J., 1995. Self-initiated versus externally triggered movements. I. An investigation using measurement of regional cerebral blood flow with PET and movement-related potentials in normal and Parkinson's disease subjects. *Brain J. Neurol.* 118 ( Pt 4), 913–933.
- Keller, I., Heckhausen, H., 1990. Readiness potentials preceding spontaneous motor acts: voluntary vs. involuntary control. *Electroencephalogr. Clin. Neurophysiol.* 76, 351–361.
- Kiani, R., Hanks, T.D., Shadlen, M.N., 2008. Bounded Integration in Parietal Cortex Underlies Decisions Even When Viewing Duration Is Dictated by the Environment. *J. Neurosci.* 28, 3017–3029. doi:10.1523/JNEUROSCI.4761-07.2008
- Kiesel, A., Miller, J., Jolicoeur, P., Brisson, B., 2008. Measurement of ERP latency differences: a comparison of single-participant and jackknife-based scoring methods. *Psychophysiology* 45, 250–274. doi:10.1111/j.1469-8986.2007.00618.x
- Kolling, N., Behrens, T.E.J., Mars, R.B., Rushworth, M.F.S., 2012. Neural mechanisms of foraging. *Science* 336, 95–98. doi:10.1126/science.1216930
- Kool, W., Botvinick, M., 2013. The intrinsic cost of cognitive control. *Behav. Brain Sci.* 36, 697-698; discussion 707-726. doi:10.1017/S0140525X1300109X
- Kornhuber, H.H., Deecke, L., 1990. Readiness for movement - The Bereitschaftspotential story. *Citation Classic Commentary. Curr. Contents Life Sci.* 33.
- Kornhuber, H.H., Deecke, L., 1965. Hirnpotentialänderungen bei Willkürbewegungen und passiven Bewegungen des Menschen: Bereitschaftspotential und reafferente Potentiale. *Pflüg. Arch. Für Gesamte Physiol. Menschen Tiere* 284, 1–17. doi:10.1007/BF00412364
- Krieghoff, V., Waszak, F., Prinz, W., Brass, M., 2011. Neural and behavioral correlates of intentional actions. *Neuropsychologia* 49, 767–776. doi:10.1016/j.neuropsychologia.2011.01.025

- Kristeva, R., Patino, L., Omlor, W., 2007. Beta-range cortical motor spectral power and corticomuscular coherence as a mechanism for effective corticospinal interaction during steady-state motor output. *NeuroImage* 36, 785–792. doi:10.1016/j.neuroimage.2007.03.025
- Libet, B., Gleason, C.A., Wright, E.W., Pearl, D.K., 1983. Time of conscious intention to act in relation to onset of cerebral activity (readiness-potential). The unconscious initiation of a freely voluntary act. *Brain J. Neurol.* 106 (Pt 3), 623–642.
- Manohar, S.G., Chong, T.T.-J., Apps, M.A.J., Batla, A., Stamelou, M., Jarman, P.R., Bhatia, K.P., Husain, M., 2015. Reward Pays the Cost of Noise Reduction in Motor and Cognitive Control. *Curr. Biol.* CB 25, 1707–1716. doi:10.1016/j.cub.2015.05.038
- Maris, E., Oostenveld, R., 2007. Nonparametric statistical testing of EEG- and MEG-data. *J. Neurosci. Methods* 164, 177–190. doi:10.1016/j.jneumeth.2007.03.024
- Murakami, M., Vicente, M.I., Costa, G.M., Mainen, Z.F., 2014. Neural antecedents of self-initiated actions in secondary motor cortex. *Nat. Neurosci.* doi:10.1038/nn.3826
- Nachev, P., Hacker, P., 2014. The neural antecedents to voluntary action: a conceptual analysis. *Cogn. Neurosci.* 5, 193–208. doi:10.1080/17588928.2014.934215
- Nachev, P., Kennard, C., Husain, M., 2008. Functional role of the supplementary and pre-supplementary motor areas. *Nat. Rev. Neurosci.* 9, 856–869. doi:10.1038/nrn2478
- Oostenveld, R., Fries, P., Maris, E., Schoffelen, J.-M., Oostenveld, R., Fries, P., Maris, E., Schoffelen, J.-M., 2010. FieldTrip: Open Source Software for Advanced Analysis of MEG, EEG, and Invasive Electrophysiological Data, FieldTrip: Open Source Software for Advanced Analysis of MEG, EEG, and Invasive Electrophysiological Data. *Comput. Intell. Neurosci. Comput. Intell. Neurosci.* 2011, 2011, e156869. doi:10.1155/2011/156869, 10.1155/2011/156869
- Papa, S.M., Artieda, J., Obeso, J.A., 1991. Cortical activity preceding self-initiated and externally triggered voluntary movement. *Mov. Disord. Off. J. Mov. Disord. Soc.* 6, 217–224. doi:10.1002/mds.870060305
- Passingham, R., 1995. *The Frontal Lobes and Voluntary Action*. Oxford University Press.
- Passingham, R.E., Bengtsson, S.L., Lau, H.C., 2010. Medial frontal cortex: from self-generated action to reflection on one's own performance. *Trends Cogn. Sci.* 14, 16–21. doi:10.1016/j.tics.2009.11.001
- Pereboom, D., 2011. Free Will Skepticism and Meaning in Life, in: Kane, R. (Ed.), *The Oxford Handbook of Free Will*. Oxford University Press.
- Pfurtscheller, G., Lopes da Silva, F.H., 1999. Event-related EEG/MEG synchronization and desynchronization: basic principles. *Clin. Neurophysiol. Off. J. Int. Fed. Clin. Neurophysiol.* 110, 1842–1857.

- Pfurtscheller, G., Neuper, C., 1994. Event-related synchronization of mu rhythm in the EEG over the cortical hand area in man. *Neurosci. Lett.* 174, 93–96.
- Saberi-Moghadam, S., Ferrari-Toniolo, S., Ferraina, S., Caminiti, R., Battaglia-Mayer, A., 2016. Modulation of Neural Variability in Premotor, Motor, and Posterior Parietal Cortex during Change of Motor Intention. *J. Neurosci. Off. J. Soc. Neurosci.* 36, 4614–4623. doi:10.1523/JNEUROSCI.3300-15.2016
- Schurger, A., Sarigiannidis, I., Naccache, L., Sitt, J.D., Dehaene, S., 2015. Cortical activity is more stable when sensory stimuli are consciously perceived. *Proc. Natl. Acad. Sci. U. S. A.* 112, E2083-2092. doi:10.1073/pnas.1418730112
- Schurger, A., Sitt, J.D., Dehaene, S., 2012. An accumulator model for spontaneous neural activity prior to self-initiated movement. *Proc. Natl. Acad. Sci.* 109, E2904–E2913. doi:10.1073/pnas.1210467109
- Schüür, F., Haggard, P., 2011. What are self-generated actions? *Conscious. Cogn.* 20, 1697–1704. doi:10.1016/j.concog.2011.09.006
- Shadlen, M.N., Gold, J.I., 2004. , in: Gazzaniga, M.S. (Ed.), *The Cognitive Neurosciences*. MIT Press, pp. 1229–1241.
- Sherrington, C.S., 1906. *The integrative action of the nervous system*. New York, C Scribner's sons.
- Shibasaki, H., Hallett, M., 2006. What is the Bereitschaftspotential? *Clin. Neurophysiol. Off. J. Int. Fed. Clin. Neurophysiol.* 117, 2341–2356. doi:10.1016/j.clinph.2006.04.025
- Sinnott-Armstrong, W., Nadel, L. (Eds.), 2010. *Conscious Will and Responsibility: A Tribute to Benjamin Libet*, 1 edition. ed. OUP USA, Oxford ; New York.
- Stancák, A., Pfurtscheller, G., 1996. Event-related desynchronisation of central beta-rhythms during brisk and slow self-paced finger movements of dominant and nondominant hand. *Brain Res. Cogn. Brain Res.* 4, 171–183.
- Tzagarakis, C., Ince, N.F., Leuthold, A.C., Pellizzer, G., 2010. Beta-band activity during motor planning reflects response uncertainty. *J. Neurosci. Off. J. Soc. Neurosci.* 30, 11270–11277. doi:10.1523/JNEUROSCI.6026-09.2010
- Usher, M., McClelland, J.L., 2001. The time course of perceptual choice: the leaky, competing accumulator model. *Psychol. Rev.* 108, 550–592.
- Verbaarschot, C., Farquhar, J., Haselager, P., 2015. Lost in time...: The search for intentions and Readiness Potentials. *Conscious. Cogn.* 33C, 300–315. doi:10.1016/j.concog.2015.01.011
- Wiese, H., Stude, P., Nebel, K., de Greiff, A., Forsting, M., Diener, H.C., Keidel, M., 2004. Movement preparation in self-initiated versus externally triggered movements: an event-related fMRI-study. *Neurosci. Lett.* 371, 220–225. doi:10.1016/j.neulet.2004.08.078

Zylberberg, A., Fetsch, C.R., Shadlen, M.N., 2016. The influence of evidence volatility on choice, reaction time and confidence in a perceptual decision. *eLife* 5.  
doi:10.7554/eLife.17688

## Supporting Information

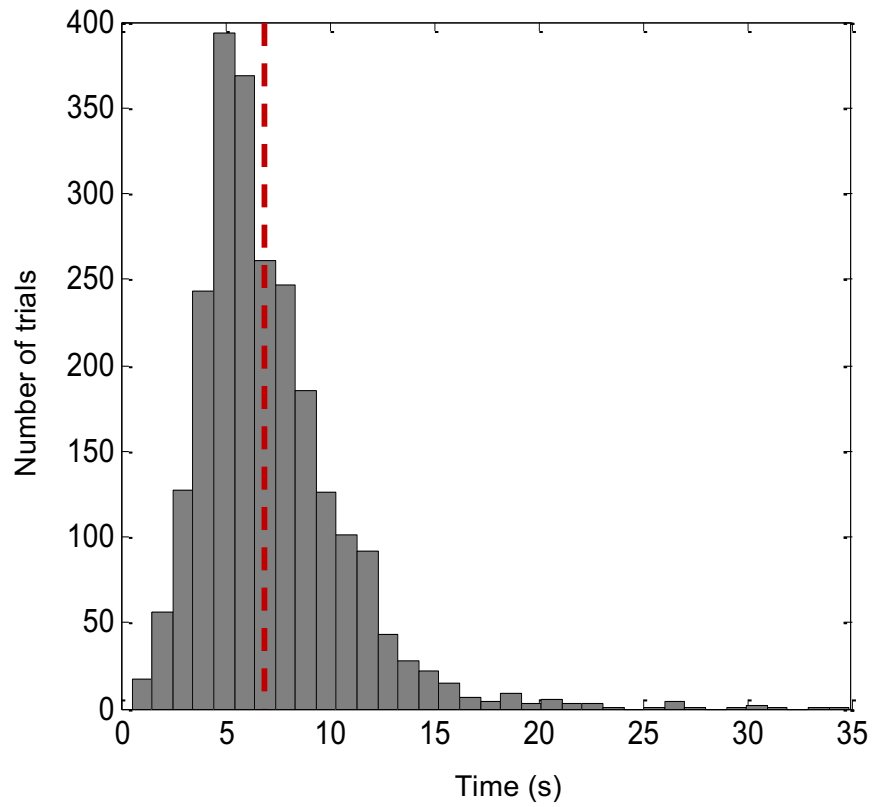

Figure S1. Histogram of waiting times before skip actions in self-initiated condition, across all trials and all participants. The dashed red line shows the average waiting time.



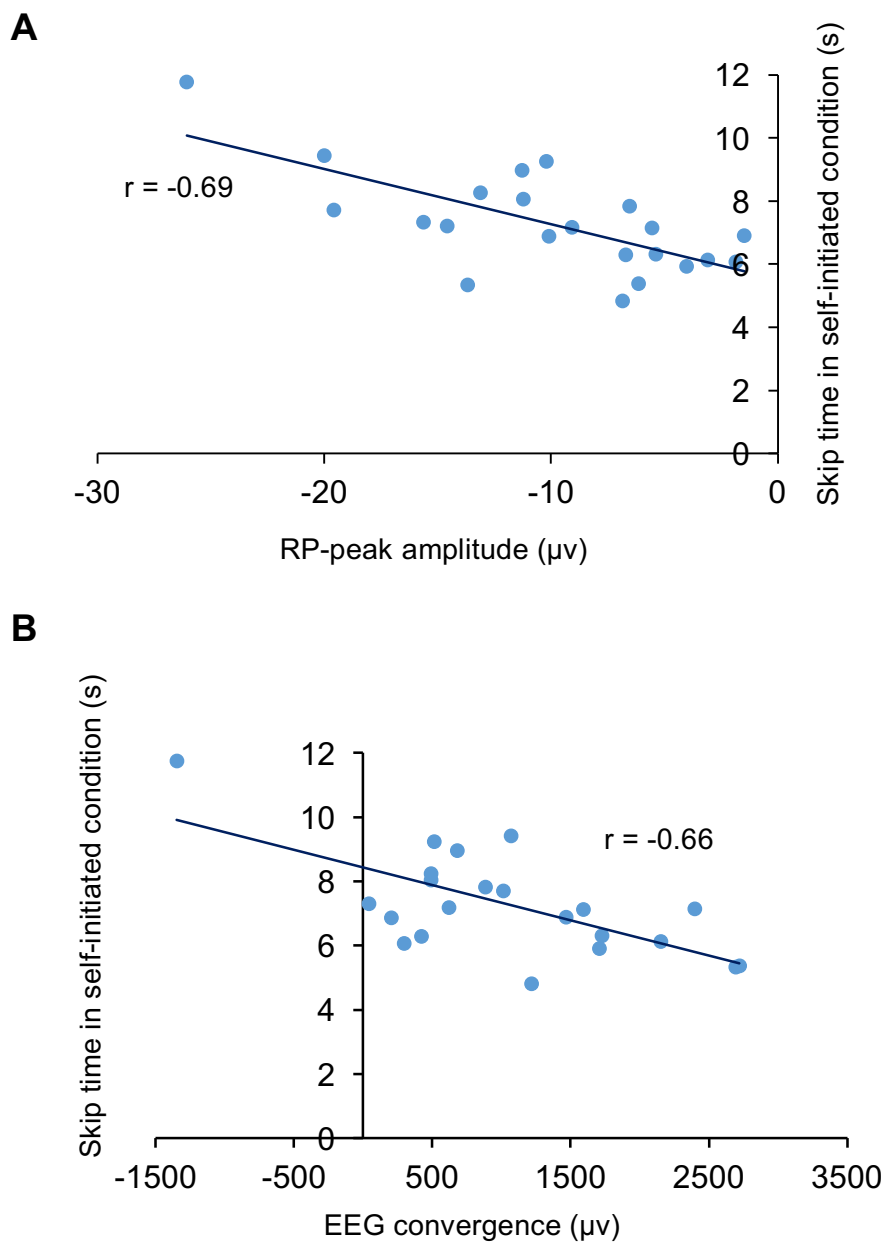

Figure S2. Correlation between participants' mean waiting time (s) before skipping in the self-initiated condition and RP-peak amplitude (A), and EEG convergence (B). EEG convergence was measured by subtracting the area under the SD curve in self-initiated from the externally-triggered condition. There was a significant negative correlation between waiting time and RP-peak amplitude (Pearson's  $r = -0.69$ ,  $p < 0.01$ ), and maximum EEG convergence (Pearson's  $r = -0.66$ ,  $p < 0.01$ ).

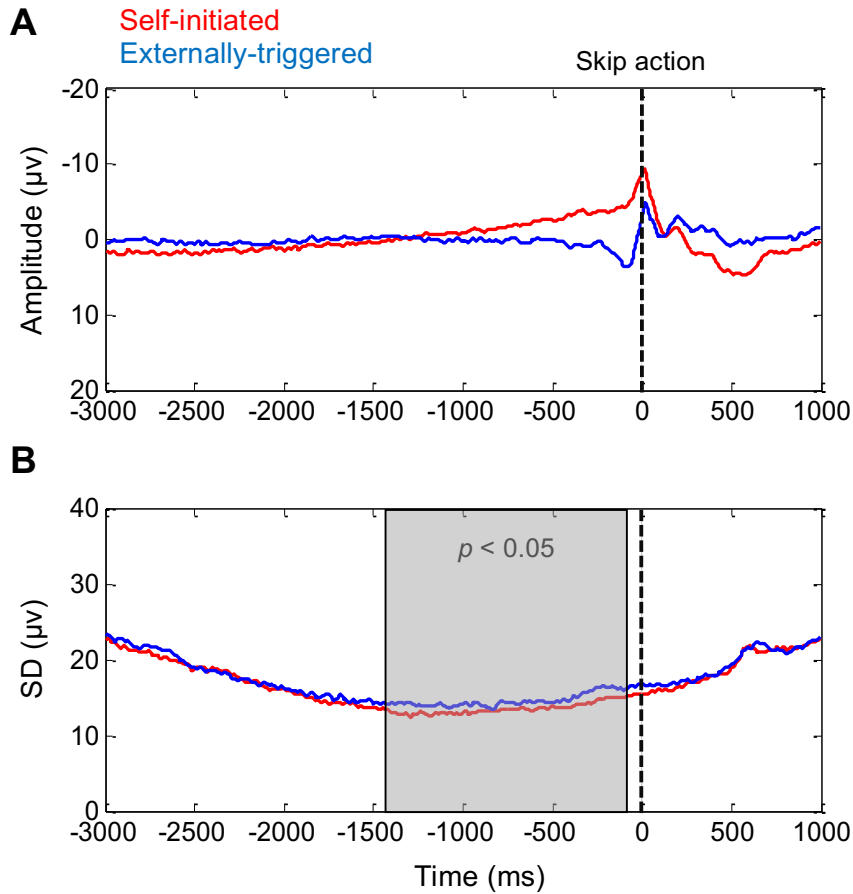

Figure S3. Demeaned EEG activity prior to skip actions. The red and blue lines represent self-initiated and externally-triggered skips, respectively. Data is time-locked to the skip action (black vertical line), and is baselined to the mean of entire epoch (i.e., demeaned), and recorded from FCz electrode. A. Grand average RP amplitude. B. Standard deviation across trials averaged across participants. Shaded area show significant clusters across central electrodes, detected by cluster-based permutation test. Whereas baselining to a limited time window forces a low SD within the baseline time window, and a progressive rise in SD with temporal distance before or after the baseline, the use of a broad baseline time window, as here, reduces this artefactual effect of baseline-correction on variability of time-locked data. Nevertheless, the difference in SD between conditions remains significant.

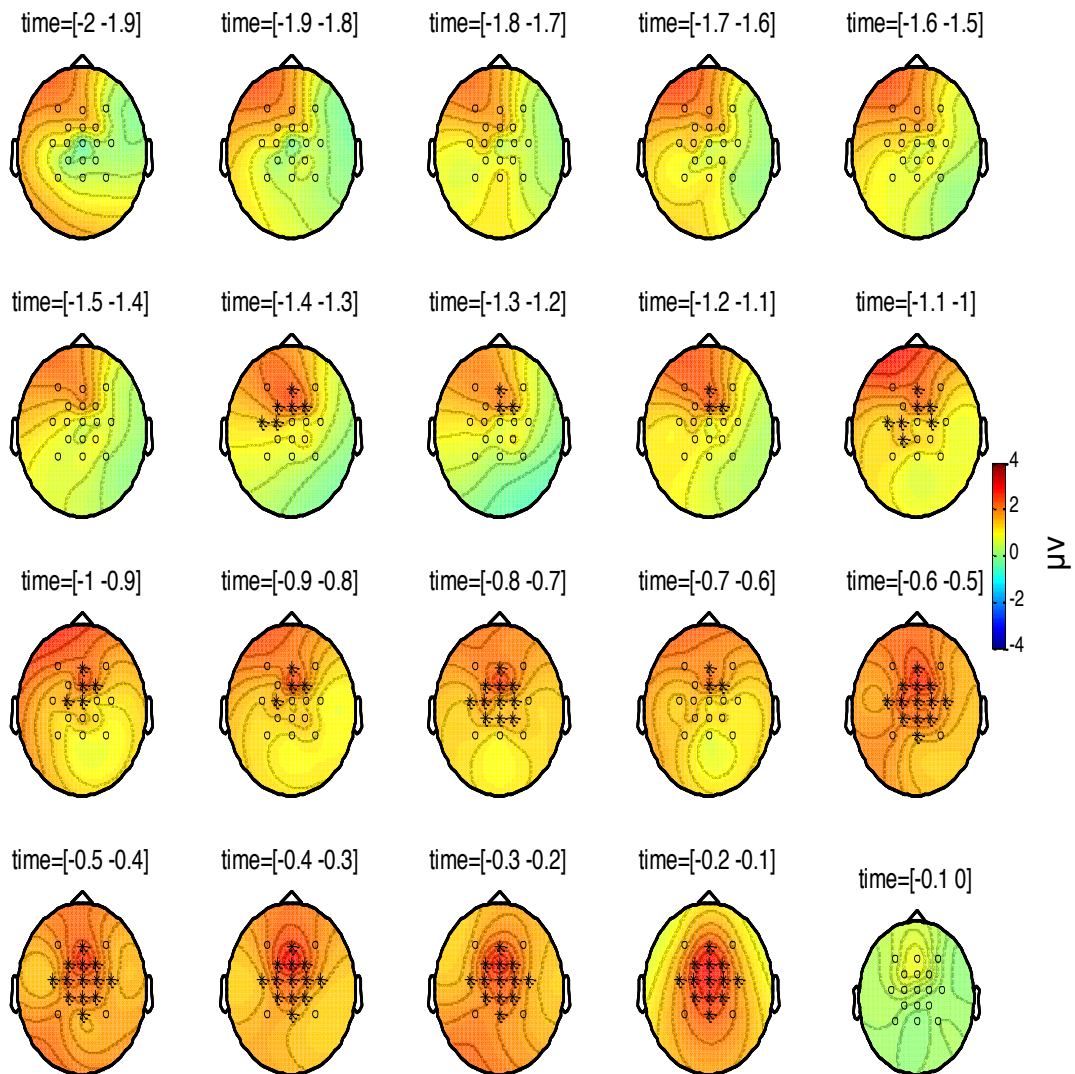

Figure S4. Topography of the difference in SDs between self-initiated and externally-triggered conditions. Small circles represent EEG electrodes across which the permutation test was performed. Electrodes that showed significant difference between conditions have been marked \*. The time interval (s) is indicated above each subplot.

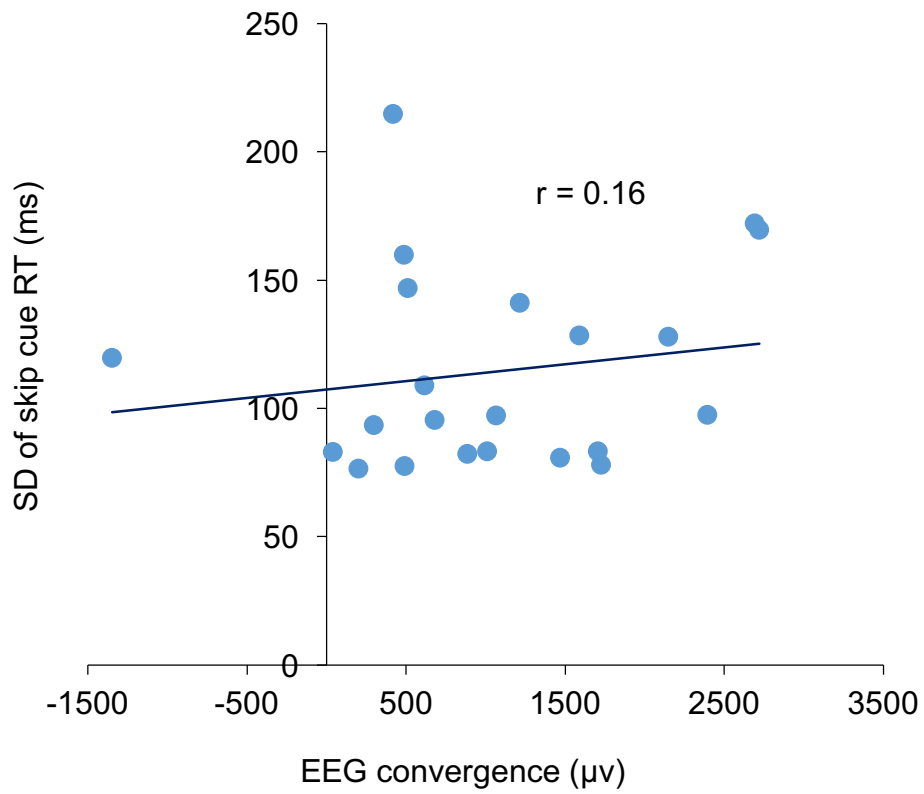

Fig S5. No significant correlation (Pearson's  $r = 0.16$ ,  $p = 0.46$ ) across participants between standard deviation of each participant's RT to externally-triggered skip cues (ms), and EEG convergence. EEG convergence was measured by subtracting the area under the SD curve in self-initiated from the externally-triggered condition.

| Subject | Mean wait (s)<br>self-initiated | Mean wait (s)<br>externally-triggered | SD (s)<br>self-initiated | SD (s)<br>externally-triggered |
|---------|---------------------------------|---------------------------------------|--------------------------|--------------------------------|
| 1       | 11.76                           | 12.09                                 | 6.82                     | 6.79                           |
| 2       | 5.38                            | 5.76                                  | 2.27                     | 2.30                           |
| 3       | 6.14                            | 6.45                                  | 4.58                     | 4.61                           |
| 4       | 7.16                            | 7.45                                  | 3.25                     | 3.22                           |
| 5       | 8.25                            | 8.39                                  | 4.57                     | 3.97                           |
| 6       | 7.21                            | 7.70                                  | 3.22                     | 3.27                           |
| 7       | 5.92                            | 6.20                                  | 1.66                     | 1.67                           |
| 8       | 7.83                            | 8.16                                  | 3.20                     | 3.23                           |
| 9       | 6.08                            | 6.48                                  | 1.26                     | 1.20                           |
| 10      | 6.32                            | 6.54                                  | 2.96                     | 2.68                           |
| 11      | 5.34                            | 5.85                                  | 1.00                     | 1.01                           |
| 12      | 6.89                            | 7.28                                  | 2.72                     | 2.70                           |
| 13      | 4.83                            | 5.23                                  | 1.83                     | 1.82                           |
| 14      | 8.06                            | 8.23                                  | 2.66                     | 2.54                           |
| 15      | 8.97                            | 9.44                                  | 3.60                     | 3.60                           |
| 16      | 9.25                            | 9.66                                  | 5.85                     | 5.91                           |
| 17      | 6.30                            | 6.81                                  | 2.69                     | 2.61                           |
| 18      | 7.72                            | 8.14                                  | 2.53                     | 2.57                           |
| 19      | 6.90                            | 7.16                                  | 2.94                     | 2.93                           |
| 20      | 7.32                            | 7.80                                  | 2.40                     | 2.62                           |
| 21      | 9.44                            | 9.85                                  | 2.93                     | 2.94                           |
| 22      | 7.14                            | 7.73                                  | 4.74                     | 5.19                           |

Table S1. Mean and standard deviation of waiting time before skipping in self-initiated and externally-triggered conditions.

| Drift ( $l$ ) | Leak ( $k$ ) | Initial noise ( $c_1$ ) | Final noise ( $c_2$ ) | Threshold | Change in noise ( $\Delta c$ ) |
|---------------|--------------|-------------------------|-----------------------|-----------|--------------------------------|
| 0.04          | -0.18        | 0.08                    | 0.01                  | 0.10      | -0.07                          |
| 0.11          | 0.55         | 0.12                    | 0.13                  | 0.14      | 0.00                           |
| 0.11          | 0.57         | 0.13                    | 0.11                  | 0.18      | -0.02                          |
| 0.11          | 0.52         | 0.12                    | 0.12                  | 0.17      | 0.00                           |
| 0.09          | 0.23         | 0.19                    | 0.14                  | 0.41      | -0.05                          |
| 0.01          | 0.38         | 0.23                    | 0.13                  | 0.42      | -0.10                          |
| 0.10          | 0.50         | 0.14                    | 0.13                  | 0.20      | -0.01                          |
| 0.12          | 0.62         | 0.10                    | 0.14                  | 0.08      | 0.04                           |
| 0.11          | 0.57         | 0.11                    | 0.13                  | 0.11      | 0.01                           |
| 0.02          | 0.27         | 0.25                    | 0.12                  | 0.44      | -0.13                          |
| 0.08          | 0.14         | 0.21                    | 0.13                  | 0.38      | -0.08                          |
| 0.11          | 0.53         | 0.12                    | 0.12                  | 0.13      | 0.01                           |
| 0.09          | 0.11         | 0.21                    | 0.12                  | 0.35      | -0.09                          |
| 0.06          | 0.17         | 0.21                    | 0.12                  | 0.39      | -0.09                          |
| 0.07          | 0.28         | 0.19                    | 0.14                  | 0.36      | -0.05                          |
| 0.11          | 0.53         | 0.12                    | 0.11                  | 0.12      | -0.01                          |
| 0.11          | 0.54         | 0.12                    | 0.12                  | 0.13      | 0.01                           |
| 0.08          | 0.22         | 0.18                    | 0.12                  | 0.29      | -0.06                          |
| 0.11          | 0.60         | 0.12                    | 0.13                  | 0.09      | 0.01                           |
| 0.11          | 0.53         | 0.12                    | 0.12                  | 0.13      | 0.01                           |
| 0.17          | 0.59         | 0.18                    | 0.24                  | 0.74      | 0.06                           |
| 0.11          | 0.55         | 0.13                    | 0.12                  | 0.15      | 0.00                           |

Table S2. Optimum parameters for self-initiated skip action. The values were detected by fitting the model against the mean RP amplitude of each participant in self-initiated condition.  $\Delta c$  was measured by subtracting the initial noise level ( $c_1$ ) from the final noise level ( $c_2$ ).

| Drift ( $l$ ) | Leak ( $k$ ) | Initial noise ( $c_1$ ) | Final noise ( $c_2$ ) | Threshold | Change in noise ( $\Delta c$ ) |
|---------------|--------------|-------------------------|-----------------------|-----------|--------------------------------|
| 0.09          | 0.42         | 0.08                    | 0.10                  | 0.10      | 0.02                           |
| 0.11          | 1.01         | 0.12                    | 0.21                  | 0.14      | 0.09                           |
| 0.10          | 0.35         | 0.13                    | 0.13                  | 0.18      | 0.00                           |
| 0.16          | 0.70         | 0.12                    | 0.16                  | 0.17      | 0.04                           |
| 0.12          | 0.48         | 0.19                    | 0.18                  | 0.41      | -0.01                          |
| 0.10          | 0.48         | 0.23                    | 0.17                  | 0.42      | -0.05                          |
| 0.09          | 0.26         | 0.14                    | 0.07                  | 0.20      | -0.06                          |
| 0.17          | 0.93         | 0.10                    | 0.24                  | 0.08      | 0.13                           |
| 0.18          | 0.44         | 0.11                    | 0.19                  | 0.11      | 0.08                           |
| 0.05          | 0.44         | 0.25                    | 0.22                  | 0.44      | -0.03                          |
| 0.10          | 0.38         | 0.21                    | 0.17                  | 0.38      | -0.04                          |
| 0.19          | 0.72         | 0.12                    | 0.15                  | 0.13      | 0.03                           |
| 0.10          | 0.41         | 0.21                    | 0.18                  | 0.35      | -0.03                          |
| 0.08          | 0.54         | 0.21                    | 0.17                  | 0.39      | -0.04                          |
| 0.12          | 0.51         | 0.19                    | 0.23                  | 0.36      | 0.05                           |
| 0.16          | 0.87         | 0.12                    | 0.15                  | 0.12      | 0.04                           |
| 0.18          | 0.69         | 0.12                    | 0.16                  | 0.13      | 0.04                           |
| 0.10          | 0.45         | 0.18                    | 0.15                  | 0.29      | -0.03                          |
| 0.21          | 0.75         | 0.12                    | 0.17                  | 0.09      | 0.05                           |
| 0.17          | 0.77         | 0.12                    | 0.20                  | 0.13      | 0.09                           |
| 0.10          | 0.61         | 0.18                    | 0.20                  | 0.74      | 0.01                           |
| 0.16          | 0.58         | 0.13                    | 0.16                  | 0.15      | 0.03                           |

Table S3. Optimum parameters for externally-triggered skip action. The values were detected by fitting the model against the mean RP amplitude of each participant in externally-triggered condition.  $\Delta c$  was measured by subtracting the initial noise level ( $c_1$ ) from the final noise level ( $c_2$ ).  $c_1$  and the threshold were fixed at their optimum values in self-initiated condition (see materials and methods for more details)
